# Supplementary material for: Cross-sectional assessment of tuberculosis and HIV prevalence in 13 correctional facilities in Zambia
Source: PubMed Central journal article supplement — BMJ Open. 2021 Sep 27;11(9):e052221. doi: 10.1136/bmjopen-2021-052221 (PMC8477336; doi:10.1136/bmjopen-2021-052221), 2021-09-27
Supplement: bmjopen-2021-052221.draft_revisions.pdf [file bmjopen-2021-052221.draft_revisions.pdf]

# BMJ Open

BMJ Open is committed to open peer review. As part of this commitment we make the peer review history of every article we publish publicly available.

When an article is published we post the peer reviewers' comments and the authors' responses online. We also post the versions of the paper that were used during peer review. These are the versions that the peer review comments apply to.

The versions of the paper that follow are the versions that were submitted during the peer review process. They are not the versions of record or the final published versions. They should not be cited or distributed as the published version of this manuscript.

BMJ Open is an open access journal and the full, final, typeset and author-corrected version of record of the manuscript is available on our site with no access controls, subscription charges or pay-per-view fees (<http://bmjopen.bmj.com>).

If you have any questions on BMJ Open's open peer review process please email [info.bmjopen@bmj.com](mailto:info.bmjopen@bmj.com)

# BMJ Open

## Prevalence of Tuberculosis and Human Immunodeficiency Virus in Zambian correctional facilities

|                               |                                                                                                                                                                                                                                                                                                                                                                                                                                                                                                                                                                                                                                                                                                                                                                                                     |
|-------------------------------|-----------------------------------------------------------------------------------------------------------------------------------------------------------------------------------------------------------------------------------------------------------------------------------------------------------------------------------------------------------------------------------------------------------------------------------------------------------------------------------------------------------------------------------------------------------------------------------------------------------------------------------------------------------------------------------------------------------------------------------------------------------------------------------------------------|
| Journal:                      | <i>BMJ Open</i>                                                                                                                                                                                                                                                                                                                                                                                                                                                                                                                                                                                                                                                                                                                                                                                     |
| Manuscript ID                 | bmjopen-2021-052221                                                                                                                                                                                                                                                                                                                                                                                                                                                                                                                                                                                                                                                                                                                                                                                 |
| Article Type:                 | Original research                                                                                                                                                                                                                                                                                                                                                                                                                                                                                                                                                                                                                                                                                                                                                                                   |
| Date Submitted by the Author: | 14-Apr-2021                                                                                                                                                                                                                                                                                                                                                                                                                                                                                                                                                                                                                                                                                                                                                                                         |
| Complete List of Authors:     | Kagujje, Mary; Center for Infectious Disease Research in Zambia, Tuberculosis department<br>Hatwiinda, Sisa; Center for Infectious Disease Research in Zambia, Tuberculosis department<br>Somwe, Paul; Center for Infectious Disease Research in Zambia, Strategic Information department<br>Bwalya, Joel; Center for Infectious Disease Research in Zambia, Strategic Information department<br>Zgambo, Tamala; Zambia Correctional Service<br>Thornicroft, Moomba; Center for Infectious Disease Research in Zambia, Tuberculosis department<br>Bozzani, Fiammetta; London School of Hygiene and Tropical Medicine Faculty of Public Health and Policy<br>Moonga, Clement; Center for Infectious Disease Research in Zambia<br>Muyoyeta, Monde ; Center for Infectious Disease Research in Zambia |
| Keywords:                     | Tuberculosis < INFECTIOUS DISEASES, HIV & AIDS < INFECTIOUS DISEASES, EPIDEMIOLOGY, PUBLIC HEALTH                                                                                                                                                                                                                                                                                                                                                                                                                                                                                                                                                                                                                                                                                                   |
|                               |                                                                                                                                                                                                                                                                                                                                                                                                                                                                                                                                                                                                                                                                                                                                                                                                     |

SCHOLARONE™  
Manuscripts

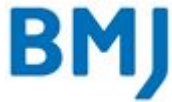

I, the Submitting Author has the right to grant and does grant on behalf of all authors of the Work (as defined in the below author licence), an exclusive licence and/or a non-exclusive licence for contributions from authors who are: i) UK Crown employees; ii) where BMJ has agreed a CC-BY licence shall apply, and/or iii) in accordance with the terms applicable for US Federal Government officers or employees acting as part of their official duties; on a worldwide, perpetual, irrevocable, royalty-free basis to BMJ Publishing Group Ltd ("BMJ") its licensees and where the relevant Journal is co-owned by BMJ to the co-owners of the Journal, to publish the Work in this journal and any other BMJ products and to exploit all rights, as set out in our [licence](#).

The Submitting Author accepts and understands that any supply made under these terms is made by BMJ to the Submitting Author unless you are acting as an employee on behalf of your employer or a postgraduate student of an affiliated institution which is paying any applicable article publishing charge ("APC") for Open Access articles. Where the Submitting Author wishes to make the Work available on an Open Access basis (and intends to pay the relevant APC), the terms of reuse of such Open Access shall be governed by a Creative Commons licence – details of these licences and which [Creative Commons](#) licence will apply to this Work are set out in our licence referred to above.

Other than as permitted in any relevant BMJ Author's Self Archiving Policies, I confirm this Work has not been accepted for publication elsewhere, is not being considered for publication elsewhere and does not duplicate material already published. I confirm all authors consent to publication of this Work and authorise the granting of this licence.

# 1 Prevalence of Tuberculosis and Human Immunodeficiency 2 Virus in Zambian correctional facilities

3  
4 Mary Kagujje ([0000-0003-4818-6548](tel:0000-0003-4818-6548))<sup>1</sup>, Sisa Hatwiinda<sup>1</sup>, Paul Somwe<sup>2</sup>, Joel Bwalya<sup>2</sup>, Tamala  
5 Zgambo<sup>3</sup>, Moomba Thornicroft<sup>1</sup>, Fiammetta Bozzani<sup>4</sup>, Clement Nchimunya Moonga<sup>1</sup>, Monde  
6 Muyoyeta<sup>1</sup>

## 7 Author affiliations

- 8 1. Tuberculosis department, Centre for Infectious Disease Research in Zambia, P.O. Box 34681  
9 Lusaka, Zambia 10101
- 10 2. Strategic Information department, Centre for Infectious Disease Research in Zambia, P.O. Box  
11 34681 Lusaka, Zambia 10101
- 12 3. Zambia Correctional Service, P.O. Box 80926 Kabwe, Zambia 10101
- 13 4. London School of Hygiene and Tropical Medicine, Keppel Street London WC1E 7HT, United  
14 Kingdom

15  
16 Correspondence to Mary Kagujje; [mkagujje@gmail.com](mailto:mkagujje@gmail.com)

17  
18 **Key words:** Correctional facilities, Tuberculosis, HIV, Zambia

## 21 ABSTRACT

22 **Objective:** To determine the prevalence of Tuberculosis (TB) and Human Immunodeficiency  
23 virus (HIV) in Zambian correctional facilities.

24 **Methods:** Cross sectional study

25 **Setting:** 13 correctional facilities in 7 of the 10 provinces in Zambia.

26 **Participants:** All incarcerated individuals were eligible for TB and HIV screening and testing.  
27 Of the total population of 9,699 individuals, 8,271 and 8,164 were screened for TB and HIV  
28 respectively.

29 **Interventions:** Mass and entry screening in correctional facilities was done between July 2018  
30 and February 2019.

31 **Primary outcome measures:** All forms of TB, bacteriologically confirmed TB, drug resistant  
32 TB, HIV

33 **Results:** Prevalence of all forms of TB and bacteriologically confirmed TB was 1598 per  
34 100,000 population and 1056 per 100,000 population, respectively. Among those with  
35 bacteriologically confirmed TB, 4.6% had drug resistant TB. The prevalence of HIV was 14.3%.

36 **Conclusion:** Prevalence of all forms of TB and HIV in correctional facilities has reduced by  
37 about 75% and 8.6% respectively. However, the prevalence of all forms of TB and HIV was 3.5  
38 and 1.3 times higher than in the general population, respectively. TB/HIV programs in  
39 correctional facilities need further strengthening.

1  
2  
3  
4  
5 40 **ARTICLE SUMMARY**  
6  
7

8  
9 41 **Strengths and limitations of this study**  
10

- 11 42 • Results are generalisable as a large sample was screened.  
12  
13 43 • Variations in TB screening algorithms could have underestimated TB prevalence.  
14  
15  
16 44 • Asymptomatic TB was not consistently screened for.  
17  
18  
19  
20  
21 45

## 46 INTRODUCTION

47 Globally, correctional facilities are disproportionately affected by tuberculosis (TB) and the  
48 Human Immunodeficiency Virus (HIV). (1-3) In some correctional facilities: the prevalence of  
49 TB has been reported to be up to 100 times higher than the prevalence in the general  
50 population (1) while the prevalence of HIV has been reported to be up to 23 times higher  
51 than the prevalence in the general population(3). Much as the living conditions in correctional  
52 facilities perpetuate TB and HIV (4, 5), incarcerated people also often come from socio-  
53 economically disadvantaged backgrounds where the burden of TB and HIV is already high. (1,  
54 3)

56 The prevalence of all forms of TB in Zambian correctional facilities was 6,428 per 100,000  
57 population, in 2011, which was 18 times higher than the national estimates. (6) In the same  
58 study, 0.6% of those with bacteriologically confirmed TB had rifampicin-resistant TB and the  
59 overall prevalence of HIV was 22.9%, which was 1.5 times the national prevalence.

61 Since the last documented prevalence survey, several interventions including test and treat  
62 for HIV, health systems strengthening, nutritional support, entry TB and HIV screening, among  
63 others, have been put in place to control the burden of TB and its associated risk factors in  
64 Zambia correctional facilities. (7-10)

66 This study aimed to determine current prevalence of all forms of TB, bacteriologically  
67 confirmed TB, and drug resistant (DR) TB and the prevalence of HIV in Zambian correctional  
68 facilities.

## 69 **METHODS**

### 70 **Study design**

71 We present an analysis of cross-sectional programmatic data collected by the Elton John  
72 Juvenile Offenders health (EJJOH) project during entry and mass screening of incarcerated  
73 people. The EJJOH project was a health system strengthening project aimed at supporting  
74 provision of holistic and integrated health services to juvenile offenders. While the project  
75 primarily targeted juveniles, it extended support to incarcerated adults in relation to  
76 infectious disease control. The project conducted a mass screening of inmates as part of its  
77 baseline assessment and strengthened entry screening, a routine practice in correctional  
78 facilities.

### 79 **Study setting and population**

80 Zambia has 87 correctional facilities with a total population of 21,000 incarcerated people.  
81 (11) The data was collected between July 2018 and February 2019 in 13 correctional facilities  
82 with a combined population of 9,699, representing 46.2% of the total correctional facility  
83 population in Zambia. The 13 facilities include Lusaka Central, Kamwala Remand, Livingstone  
84 Central, Katombora Reformatory School, Nakambala Approved school, Mukobeko Medium,  
85 Ndola remand, Kamfinsa State, Chingola, Insakwe Approved School, Chipata Central, Mongu  
86 Central and Kasama Central (locations shown in Supplementary Figure 1). The Reformatory  
87 and approved schools hold juveniles (persons less than 19 years old)(12); the other facilities  
88 are intended only for adults and circumstantial children(13) but also hold juveniles who are  
89 still undergoing trial.



1  
2  
3 90  
4  
5  
6 91 Routinely, incarcerated people undergo TB screening and HIV testing at entry or within 7 days  
7  
8 92 of admission into correctional facilities. Depending on availability of logistics, periodic TB and  
9  
10 93 HIV mass screening are carried out, with freedom to opt out of HIV testing but not TB  
11  
12  
13 94 screening and testing.  
14

15 95

## 19 96 **Study Procedures**

23 97 A project specific register was used; it was a modification of the National Presumptive TB  
24  
25 98 register with additional data elements on entry point, category of individual and previous  
26  
27  
28 99 history of TB. All inmates were screened for TB; those who did not opt out were tested for  
29  
30 100 HIV. The screening entry point was documented under one of the following: mass screening,  
31  
32 101 entry screening from the community or entry screening transfer from other correctional  
33  
34  
35 102 facility. The categories of individuals included adults, juveniles and circumstantial children.  
36  
37 103 Those already on anti-TB treatment at the time of screening were documented as TB cases  
38  
39 104 and those on anti-retroviral therapy (ART) were recorded as HIV positive; they were not  
40  
41  
42 105 retested. Those with cough, fever, weight loss, night sweats, chest pain and shortness of  
43  
44  
45 106 breath, irrespective of duration, were considered presumptive TB patients and submitted  
46  
47 107 sputum for testing using GeneXpert (Xpert MTB/Rif Assay. Cepheid, Sunnyvale, California,  
48  
49 108 USA). Symptomatic individuals with a negative GeneXpert were referred for Chest x-ray (CXR)  
50  
51  
52 109 depending on the clinician's discretion. There were 3 variations to this algorithm: 1) In Lusaka  
53  
54  
55 110 central, a random proportion of the incarcerated population received CXR in addition to  
56  
57 111 symptoms screening and those with either abnormal CXR or symptoms submitted sputum for  
58  
59 112 GeneXpert; 2) at Ndola remand, all except those already on TB treatment submitted sputum  
60

1  
2  
3 113 irrespective of symptoms; and 3) in Kabwe medium, Fluorescent Microscopy (FM) was used  
4  
5  
6 114 for sputum examination instead of GeneXpert.  
7

8 115  
9  
10 116 Alere Determine™ HIV-1/2 test (AlereHIV-1/2; Abbott, Chicago, IL, USA) was used for HIV  
11  
12  
13 117 screening and SD-Bioline HIV-1/2 (SD-Bioline HIV-1/2; Abbott, Chicago, IL, USA) for  
14  
15 118 confirmation of positive screening test, following the standard Zambian HIV testing algorithm.

16  
17  
18 119 All individuals received pre- and post-test HIV counselling. HIV positive inmates were  
19  
20 120 commenced on ART within 1-2 days.  
21  
22

## 23 24 121 **Data analysis**

25  
26  
27  
28 122 STATA Statistical Software (Stata Corporation Version 14. College Station, Texas 77845, USA)  
29  
30 123 was used for data analysis. A descriptive analysis was done to determine the characteristics  
31  
32 124 of the population screened and the prevalence of TB and HIV; overall prevalence and  
33  
34  
35 125 prevalence among subgroups was determined. The prevalence of all forms of TB included  
36  
37 126 bacteriologically confirmed TB and clinically diagnosed TB. Bacteriologically confirmed TB  
38  
39 127 prevalence included those who had a positive GeneXpert or FM result, while patients already  
40  
41  
42 128 on TB treatment at time of screening were excluded from this analysis since data on the type  
43  
44  
45 129 of TB had not been collected. DR-TB prevalence included incarcerated people with rifampicin  
46  
47 130 resistance on GeneXpert. Missing data was excluded from the analysis.  
48  
49

50  
51 131 Additionally, a chi-square test was done to determine if there was a statistically significant  
52  
53 132 difference in prevalence of TB and HIV between residents and new entrants into correctional  
54  
55 133 facilities. New entrants were defined as incarcerated people whose entry point was entry  
56  
57  
58  
59  
60

1  
2  
3 134 screening from community while residents were defined as those whose entry point was  
4  
5  
6 135 either mass screening or entry screening transfer from other correctional facility.  
7  
8

9 **136 Ethical issues**  
10  
11  
12

13 137 Approval to use the programmatic data was obtained from the University of Zambia  
14  
15 138 Biomedical Research Ethics Committee No: 018-11-18 and the London School of Hygiene and  
16  
17  
18 139 Tropical Medicine Ethics Committee No: 21332. The EJJOH project had obtained permission  
19  
20 140 from the Zambia Correctional service and the Ministry of Community Development and Social  
21  
22  
23 141 services to conduct the screening activities. When migrating data from the paper-based  
24  
25 142 registers to the electronic database, participant identifying information was excluded.  
26  
27  
28

29 **143 Patient and Public involvement**  
30  
31  
32

33 144 The development of the research questions was intended to inform priority setting by the  
34  
35 145 EJJOH project based on the disease burden in correctional facilities. The incarcerated  
36  
37  
38 146 population were not involved in the design of the project. The correctional health committee  
39  
40 147 constituting of the incarcerated persons, correctional officers and health care workers were  
41  
42  
43 148 involved in the data collection. A representative of the correctional health committee at each  
44  
45 149 correctional facility participated in the dissemination meeting on project findings.  
46  
47  
48

49 150

50 151  
51  
52

53 **152 RESULTS**  
54  
55  
56  
57

58 **153 Flow diagram and participant characteristics**  
59  
60

1  
2  
3 154 Of the total population of 9,699 in the 13 correctional facilities, 8164 (84.2%) were screened  
4  
5  
6 155 for HIV and 8,271(85.3%) individuals were screened for TB (Figure 1). Of those screened for  
7  
8 156 HIV, 1170(14.3%) were HIV positive while 6994 were HIV negative. Of those screened for TB,  
9  
10 157 3,085 (37.3%) individuals had symptoms of TB, 5,173 (62.5%) were asymptomatic while 13  
11  
12  
13 158 (0.2%) had missing data. Of the 4,278, who submitted sputum, 3,085 (72.1%) were  
14  
15 159 symptomatic and 1,193 (27.9%) were asymptomatic for TB. Of the asymptomatic who  
16  
17 160 submitted sputum 25(2.1%) were bacteriologically confirmed while of the symptomatic,  
18  
19 161 62(2.0%) submitted sputum. A total of 132 TB cases were identified including 87 (65.9%)  
20  
21 162 bacteriologically confirmed TB cases, 28 (21.2%) clinically diagnosed TB cases and 17 (12.9%)  
22  
23 163 that were already on TB treatment at the time of screening.  
24  
25  
26  
27

28 164 Figure 1: Flow diagram of TB screening and diagnosis  
29  
30  
31 165

32  
33 166 Of those screened, 7,805 (94.37%) were adults, 462 (5.59%) were juveniles while 4 (0.05%)  
34  
35 167 were circumstantial children (Table 1). The overall median age (interquartile range (IQR)) of  
36  
37 168 the participants was 32 years (IQR 10-93); 8,181 (98.75%) of the participants were male and  
38  
39 169 467 (5.65%) of the participants had a history of previous TB. Among those screened, 8099  
40  
41 170 (97.92%) were resident inmates while 169 (2.04%) were new entrants.  
42  
43  
44

45 171 Table 1: Characteristics of population screened  
46  
47

| Variable                         | Participants (n= 8271) |
|----------------------------------|------------------------|
| Category of individual, n (%)    |                        |
| Adults                           | 7,805 (94.37%)         |
| Juveniles                        | 462 (5.59%)            |
| Circumstantial children          | 4 (0.05%)              |
| Median Age (interquartile range) |                        |
| Overall                          | 32(10-93)              |

|                                             |                |
|---------------------------------------------|----------------|
| Adults                                      | 33 (19-93)     |
| Juveniles                                   | 17 (10-18)     |
| Circumstantial children <sup>1</sup>        |                |
| Sex, n (%)                                  |                |
| Male                                        | 8,168 (98.75%) |
| Female                                      | 92 (1.11%)     |
| Missing                                     | 11 (0.13%)     |
| History of previous TB, n (%)               |                |
| Yes                                         | 467 (5.65%)    |
| No                                          | 7,790 (94.18%) |
| Missing                                     | 14 (0.17%)     |
| Type of screening visit, n (%)              |                |
| Mass screening                              | 7,602 (91.92%) |
| Entry screening other correctional facility | 497 (6.01%)    |
| Entry screening community                   | 169 (2.04%)    |
| Missing                                     | 3 (0.03%)      |

<sup>1</sup> Ages of circumstantial children were missing.

### Prevalence of all forms of TB and bacteriologically confirmed TB

The overall prevalence of all forms of TB was 1,598 (1339-1892) per 100,000 population while the overall prevalence of bacteriologically confirmed TB was 1,056 (844-1301) per 100,000 population (Table 2). There was no statistically significant difference in the prevalence of both all forms of TB and bacteriologically confirmed TB between males and females ( $p=0.51$ ) and ( $p=1.00$ ) respectively. It was the same for adults and juveniles ( $p= 0.82$ ) and ( $p= 0.23$ ) for the respective types of TB. There were no prevalent TB cases among circumstantial children.

Table 2: Prevalence of all forms of TB and bacteriologically confirmed TB

|  | Cases/<br>Participants<br>(n/N) | Prevalence<br>of all forms<br>of TB per<br>100,000 (CI) | p-<br>value | Cases/<br>Participants<br>(n/N) | Prevalence of<br>Bacteriologically<br>confirmed TB<br>per 100,000 (CI) | p-<br>value |
|--|---------------------------------|---------------------------------------------------------|-------------|---------------------------------|------------------------------------------------------------------------|-------------|
|--|---------------------------------|---------------------------------------------------------|-------------|---------------------------------|------------------------------------------------------------------------|-------------|

|                         |                        |                      |      |                         |                    |      |
|-------------------------|------------------------|----------------------|------|-------------------------|--------------------|------|
| Overall                 | 132/8,258 <sup>2</sup> | 1598<br>(1339-1892)  |      | 87/8,241 <sup>2,3</sup> | 1056<br>(844-1301) |      |
| Sex                     |                        |                      |      |                         |                    |      |
| Male                    | 129/8,155              | 1582<br>(1322-1877)  | 0.51 | 84/8,138                | 1032<br>(824-1276) | 1.00 |
| Female                  | 1/92                   | 1087<br>(27- 5908)   |      | 1/92                    | 1087<br>(27- 5908) |      |
| Missing gender          | 2/11                   |                      |      | 2/11                    |                    |      |
| Category of individual  |                        |                      |      |                         |                    |      |
| Adult inmate            | 124/7,792              | 1591<br>(1325- 1894) | 0.82 | 79/7,775                | 1016<br>(805-1265) | 0.23 |
| Juvenile inmate         | 8/462                  | 1732<br>(750-3383)   |      | 8/462                   | 1732<br>(750-3383) |      |
| Circumstantial children | 0/4                    | 0 (0-60236) *        |      | 0/4                     | 0 (0-60236) *      |      |

<sup>2</sup> Thirteen (13) participants had missing values on TB.

<sup>3</sup> Seventeen participants were already on TB treatment, bacteriological status unknown

(\*) one-sided, 97.5% confidence interval

The differences in prevalence of all forms TB and bacteriologically confirmed TB between residents and new entrants in correctional facilities were not statistically significant ( $p=0.25$ ) and ( $p=0.21$ ) respectively (Supplemental Table 1).

## Prevalence of DR TB

Among the bacteriologically confirmed TB cases, the overall prevalence of DR-TB was 4.6% (1.3%-11.4%) (Table 3). There was no statistically significant difference in prevalence of DR-TB between males and females ( $p=0.95$ ), between adults and juveniles ( $p=0.68$ ) and between those with and those without previous history of TB ( $p=0.72$ ).

Table 3: Prevalence of drug resistant TB

|                               | <b>Cases/<br/>Participants<br/>(n/N)</b> | <b>Prevalence of DR TB<br/>% (CI)</b> | <b>p-value</b> |
|-------------------------------|------------------------------------------|---------------------------------------|----------------|
| Overall                       | 4/87                                     | 4.6 (1.3-11.4)                        |                |
| <b>Sex</b>                    |                                          |                                       |                |
| Male                          | 4/84                                     | 4.8 (1.3-11.7)                        | 0.95           |
| Female                        | 0/1                                      | 0 (0- 97.5) *                         |                |
| Missing                       | 0/2                                      |                                       |                |
| <b>Category of individual</b> |                                          |                                       |                |
| Adult incarcerated people     | 4/79                                     | 5.1 (1.4- 12.5)                       | 0.68           |
| Juveniles                     | 0/8                                      | 0 (0-3.7) *                           |                |
| Circumstantial children       | 0/0                                      | 0                                     |                |
| <b>Previous History of TB</b> |                                          |                                       |                |
| No                            | 3/64                                     | 4.7 (1.0-13.1)                        | 0.72           |
| Yes                           | 1/23                                     | 4.3 (0.1- 21.9)                       |                |

\* one-sided, 97.5% confidence interval

There was no statistically significant difference in prevalence of DR TB between resident incarcerated people and new entrants into correctional facilities (p= 0.26).

### Prevalence of HIV

The overall HIV prevalence was 14.3% (13.6%-15.1%) (Table 4). The prevalence of HIV among males was 14.1% (13.4%-14.9%) and among females 25.0% (16.6%-35.1%) (p=0.01). The prevalence of HIV among adults and juveniles was 15.0% (14.1%-15.7%) and 3.9% (2.3%-6.2%) (p<0.01). There were no prevalent HIV cases among circumstantial children.

Table 4: Prevalence of HIV

|            | <b>Cases/<br/>(n/N)</b>  | <b>Participants</b> | <b>Prevalence of HIV<br/>% (CI)</b> | <b>p-value</b> |
|------------|--------------------------|---------------------|-------------------------------------|----------------|
| Overall    | 1,170/8,164 <sup>d</sup> |                     | 14.3<br>(13.6-15.1)                 |                |
| <b>Sex</b> |                          |                     |                                     |                |

|                               |             |                     |      |
|-------------------------------|-------------|---------------------|------|
| Male                          | 1,139/8,062 | 14.1<br>(13.4-14.9) | 0.01 |
| Female                        | 23/92       | 25.0<br>(16.6-35.1) |      |
| Missing sex                   | 8/10        |                     |      |
| <b>Category of individual</b> |             |                     |      |
| Adults                        | 1,153/7,727 | 15.0<br>(14.1-15.7) | 0.00 |
| Juveniles                     | 17/433      | 3.9 (2.3- 6.2)      |      |
| Circumstantial children       | 0/4         | 0 (0-60.2) *        |      |

<sup>4</sup> One hundred and seven (107) participants either opted out of HIV testing or had missing data (\*) one-sided, 97.5% confidence interval.

\*\* not determined.

The differences in prevalence of HIV between residents and new entrants into correctional facilities were not statistically significant ( $p=0.05$ ) (Supplemental Table 1).

## DISCUSSION

This study found that in Zambian correctional facilities, the prevalence of all forms of TB, bacteriologically confirmed TB and DR-TB were 3.5 times higher, 1.7 times higher and almost twice as high as in the general population, respectively. (14, 15) Additionally, the prevalence of HIV was 1.3 times higher than the prevalence in the general population (16). 25.8% of the bacteriologically confirmed TB cases were asymptomatic.

In comparison to the 2010-2011 study, the prevalence of all forms of TB had reduced by about 75%, the prevalence of bacteriologically confirmed TB has reduced by 50% but the prevalence of DR-TB has increased by 4%. (6) The prevalence of DR-TB among people with no history of TB is similar to the prevalence among people with previous history of TB, suggesting



1  
2  
3 226 significant transmission of DR-TB either in correctional facilities or in the communities where  
4  
5  
6 227 the incarcerated people come from, or both. Strengthening TB infection control can reduce  
7  
8 228 transmission of DR-TB. (17) There has been an 8.6% reduction in prevalence of HIV since the  
9  
10 229 study in 2010-2011. (6) Similar to the national picture, the prevalence of HIV was higher  
11  
12  
13 230 among adults than juvenile incarcerated people and was higher among females than males.  
14  
15 231 (16) However, the prevalence of HIV in women relative to the prevalence of HIV in men is  
16  
17 232 much higher in the incarcerated population than the general population because women with  
18  
19 233 HIV risk factors like sex worker status, intimate partner violence, drug and substance abuse  
20  
21 234 are overrepresented in this population. (18)  
22  
23  
24  
25 235  
26  
27 236 The difference in prevalence of TB and HIV between residents and new entrants into  
28  
29 237 correctional facilities was not statistically significant. This is possibly due to the following  
30  
31 238 reasons: a) individuals entering correctional facilities come from socio-economically  
32  
33 239 disadvantaged backgrounds where prevalence of TB and HIV are already high (1); b) there are  
34  
35 240 high rates of recidivism (19); and c) detainees spend long periods in police cells, which have  
36  
37 241 similar conditions to the correctional facilities (20, 21).  
38  
39  
40  
41  
42 242  
43  
44 243 The results of our study are generalizable to all correctional facilities in Zambia, as a large  
45  
46 244 sample of the inmate population, representing 36.3% of the total correctional facility  
47  
48 245 population, was screened.(11) However, there were variations in the strength of screening  
49  
50 246 algorithms for TB, hence the prevalence of TB could have been underestimated in some  
51  
52 247 correctional facilities. Additionally, asymptomatic TB was not consistently screened for.  
53  
54  
55  
56  
57  
58  
59  
60

## 248 CONCLUSION

249 Despite significant progress over the last decade in controlling TB and HIV in Zambian  
 250 correctional facilities, these continue to be disproportionately affected by both diseases.  
 251 TB/HIV programs in correctional facilities need further strengthening including aspects of  
 252 gender responsive HIV programming. Additional studies that screen for asymptomatic TB are  
 253 required.

## 255 REFERENCES

- 256 1. World Health Organization. Tuberculosis in Prisons [cited 2020 20th July 2020]. Available  
 257 from: <https://www.who.int/tb/areas-of-work/population-groups/prisons-facts/en/>.
- 258 2. Telisinghe L, Charalambous S, Topp SM, Herce ME, Hoffmann CJ, Barron P, et al. HIV and  
 259 tuberculosis in prisons in sub-Saharan Africa. *The Lancet*. 2016;388(10050):1215-27.
- 260 3. Dolan K, Wirtz AL, Moazen B, Ndeffo-Mbah M, Galvani A, Kinner SA, et al. Global burden of  
 261 HIV, viral hepatitis, and tuberculosis in prisoners and detainees. *The Lancet*. 2016;388(10049):1089-  
 262 102.
- 263 4. Reid SE, Topp SM, Turnbull ER, Hatwiinda S, Harris JB, Maggard KR, et al. Tuberculosis and  
 264 HIV control in sub-Saharan African prisons: "thinking outside the prison cell". *Journal of Infectious  
 265 Diseases*. 2012;205(suppl\_2):S265-S73.
- 266 5. World Health Organization Regional Office for Europe. Prisons and health. Copenhagen,  
 267 Denmark 2014. 45-70, 83 p.
- 268 6. Maggard KR, Hatwiinda S, Harris JB, Phiri W, Krüüner A, Kaunda K, et al. Screening for  
 269 tuberculosis and testing for human immunodeficiency virus in Zambian prisons. *Bulletin of the World  
 270 Health Organization*. 2015;93:93-101.
- 271 7. Ubumi Prisons Initiative. Zambian Prisons [updated 4th August 2020; cited 2020 4th August  
 272 2020]. Available from: [https://ubumi.net/zambian\\_prisons.html](https://ubumi.net/zambian_prisons.html).
- 273 8. Herce ME, Hoffmann CJ, Fielding K, Topp SM, Hausler H, Chimoyi L, et al. Universal test-and-  
 274 treat in Zambian and South African correctional facilities: a multisite prospective cohort study. *The  
 275 Lancet HIV*. 2020;7(12):e807-e16.
- 276 9. Topp SM, Sharma A, Moonga CN, Chileshe C, Magwende G, Henostroza G. Evaluation of a  
 277 health system strengthening initiative in the Zambian prison system. *BMJ global health*. 2018;3(1).
- 278 10. Herce ME, Muyoyeta M, Topp SM, Henostroza G, Reid SE. Coordinating the prevention,  
 279 treatment, and care continuum for HIV-associated tuberculosis in prisons: a health systems  
 280 strengthening approach. *Current Opinion in HIV and AIDS*. 2018;13(6):492.
- 281 11. Institute of Crime and Justice Policy Research B. World Prison Brief 2020 [cited 2020 21st  
 282 July 2020]. Available from: <https://www.prisonstudies.org/country/zambia>.
- 283 12. Government of the Republic of Zambia. The Juvenile Act. Chapter 53 of the Laws of  
 284 Zambia 1964.
- 285 13. Government of the Republic of Zambia. The Prisons Act Zambia: Government Printer; 2004  
 286 [cited 2020 13th May 2020]. Available from:  
 287 <http://www.parliament.gov.zm/sites/default/files/documents/acts/Prisons%20Act.pdf>.

- 1  
2  
3 288 14. Kapata N, Mbulo G, Cobelens F, de Haas P, Schaap A, Mwamba P, et al. The second Zambian  
4 289 national tuberculosis drug resistance survey—a comparison of conventional and molecular methods.  
5 290 *Tropical Medicine & International Health*. 2015;20(11):1492-500.  
6 291 15. Kapata N, Chanda-Kapata P, Ngosa W, Metitiri M, Klinkenberg E, Kalisvaart N, et al. The  
7 292 prevalence of tuberculosis in Zambia: results from the first national TB prevalence survey, 2013–  
8 293 2014. *PLoS One*. 2016;11(1):e0146392.  
9 294 16. Ministry of Health Zambia. Zambia Population-based HIV Impact assessment 2016. Lusaka;  
10 295 2019.  
11 296 17. Organization WH. WHO policy on TB infection control in health-care facilities, congregate  
12 297 settings and households. World Health Organization; 2009. Report No.: 9241598328.  
13 298 18. United Nations Office on Drug and Crime U. Women and HIV in prison settings Austria2008  
14 299 [cited 2021 1st February 2021]. Available from:  
15 300 [https://www.unodc.org/documents/middleeastandnorthafrica/drug-prevention-health-](https://www.unodc.org/documents/middleeastandnorthafrica/drug-prevention-health-publications/WOMEN_AND_HIV_IN_PRISON_SETTINGS.pdf)  
16 301 [publications/WOMEN\\_AND\\_HIV\\_IN\\_PRISON\\_SETTINGS.pdf](https://www.unodc.org/documents/middleeastandnorthafrica/drug-prevention-health-publications/WOMEN_AND_HIV_IN_PRISON_SETTINGS.pdf).  
17 302 19. Yuhnenko D, Sridhar S, Fazel S. A systematic review of criminal recidivism rates worldwide:  
18 303 3-year update. *Wellcome open research*. 2019;4.  
19 304 20. Todrys KW. *Unjust and Unhealthy: Hiv, Tb, and Abuse in Zambian Prisons*. 2010.  
20 305 21. Henostroza G, Topp SM, Hatwiinda S, Maggard KR, Phiri W, Harris JB, et al. The high burden  
21 306 of tuberculosis (TB) and human immunodeficiency virus (HIV) in a large Zambian prison: a public  
22 307 health alert. *PLoS one*. 2013;8(8):e67338.  
23  
24  
25  
26 308  
27  
28

## 309 ACKNOWLEDGEMENT

310 The Zambia Correctional Service, Ministry of Community Development and Social Welfare and  
311 the correctional health committees are acknowledged for the support provided to the EJJOH  
312 project team during data collection. Innocent Mwaba is acknowledged for drawing the map  
313 showing study sites.  
314

## 315 FUNDING

316 This research was funded by the Elton John AIDS Foundation; no grant number received.  
317

## 318 AUTHOR CONTRIBUTIONS

319 Conceived and designed the study: MK, SH, CNM, MM. Database design and data curation:  
320 PS, JB. Implemented the study: MK, SH, MT, TZ, CNM, MM. Data analysis: PS, MK, FB. Wrote  
321 the original draft: MK. Reviewed the manuscript: SH, MT, JB, PS, TZ, FB, CNM, MM. Approved  
322 the final version to be published: MK, SH, PS, MT, JB, TZ, FB, CNM, MM.  
323 The corresponding author attests that all listed authors meet authorship criteria and that no  
324 others meeting the criteria have been omitted.

## 326 CONFLICT OF INTEREST

327 The authors declare no conflict of interest.

## 329 DATA SHARING STATEMENT

330 Additional data is available upon request by emailing [Monde.Muyoyeta@cidrz.org](mailto:Monde.Muyoyeta@cidrz.org)

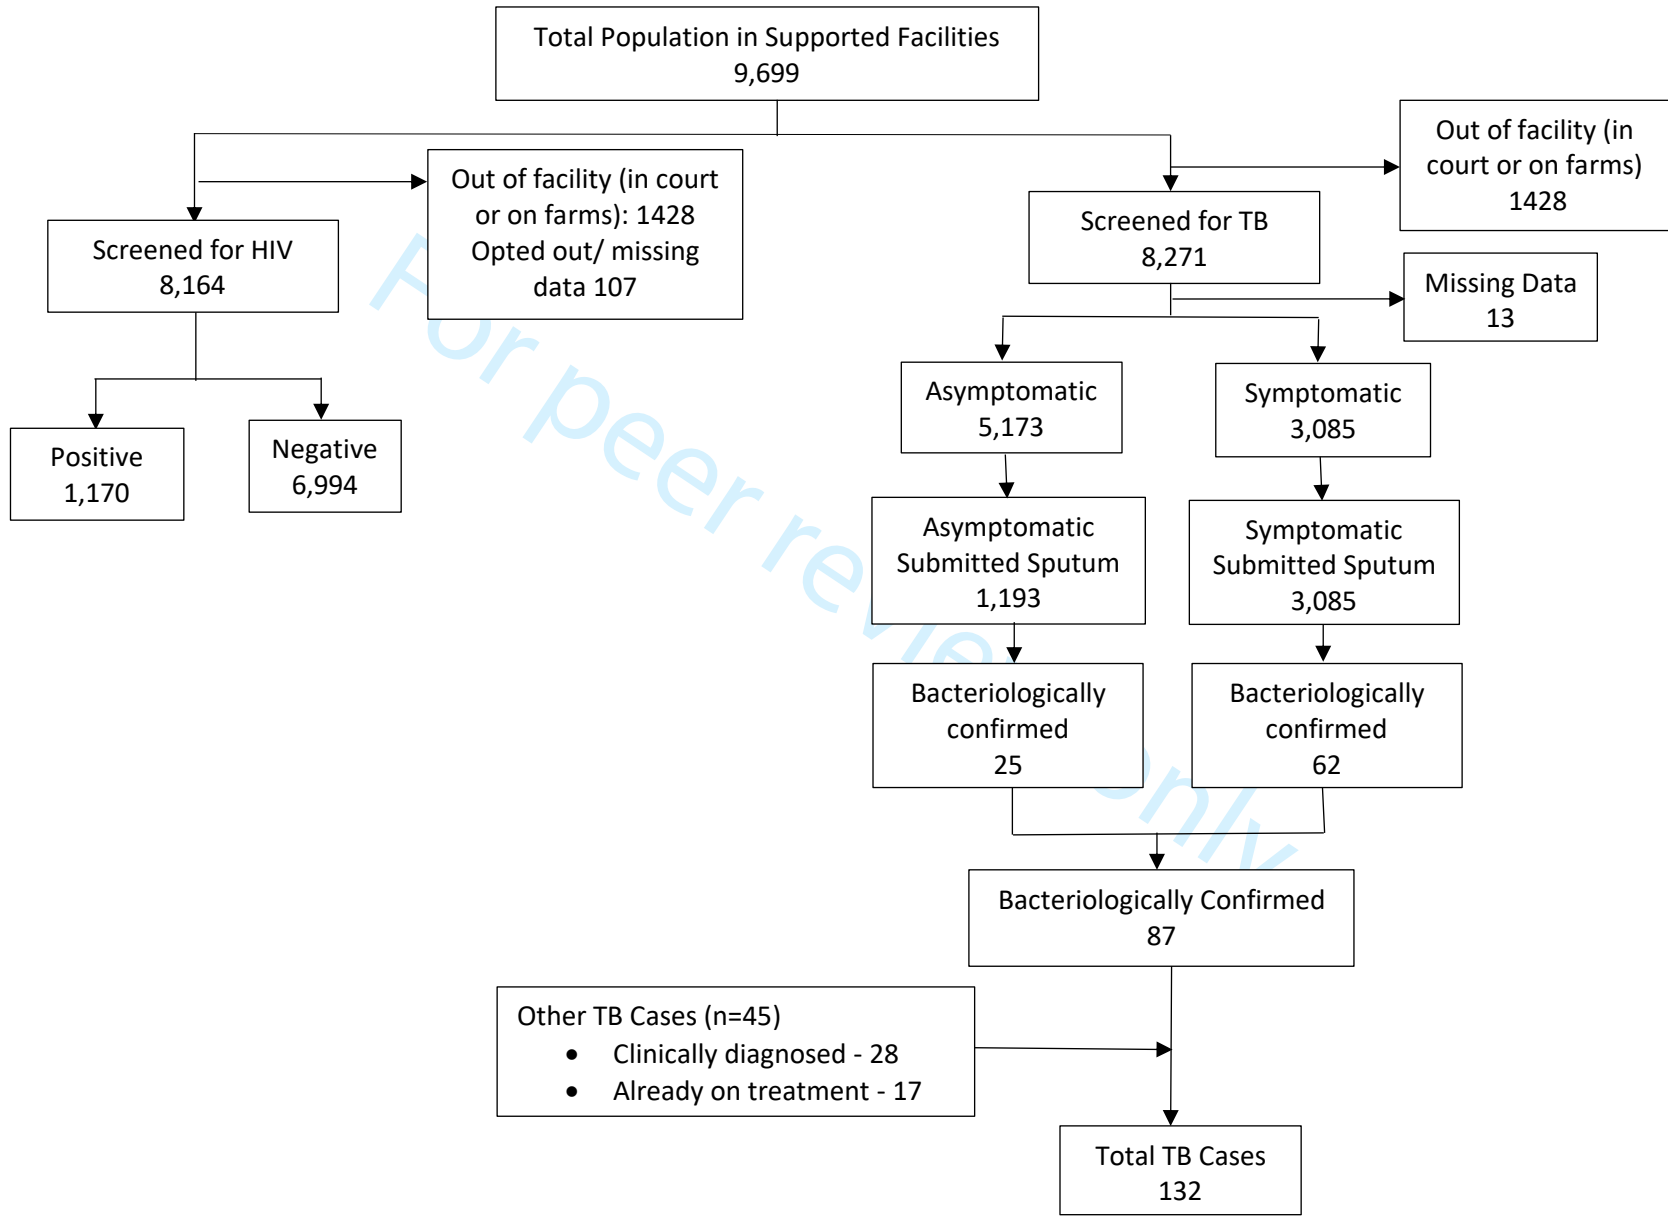

1  
2  
3  
4  
5  
6  
7  
8  
9  
10  
11  
12  
13  
14  
15  
16  
17  
18  
19  
20  
21  
22  
23  
24  
25  
26  
27  
28  
29  
30  
31  
32  
33  
34  
35  
36  
37  
38  
39  
40  
41  
42  
43  
44  
45  
46  
47  
48  
49  
50  
51  
52  
53  
54  
55  
56  
57  
58  
59  
60

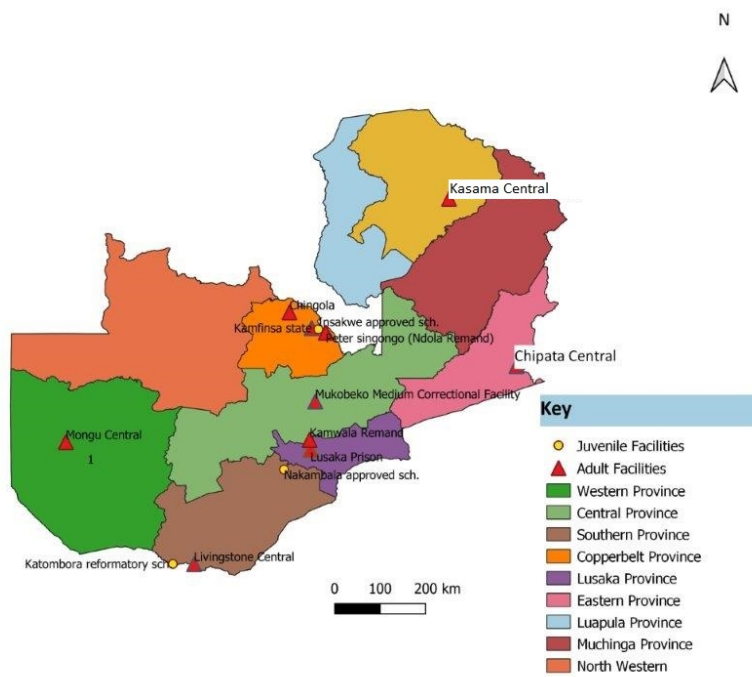

216x153mm (120 x 120 DPI)

Supplementary Table 1: Difference in prevalence of TB and HIV between resident incarcerated people and new entrants

| Type of TB                                                            | Cases/<br>Participants<br>(n/N) | Residents           | Cases/<br>Participants<br>(n/N) | New<br>Entrants    | P-<br>value |
|-----------------------------------------------------------------------|---------------------------------|---------------------|---------------------------------|--------------------|-------------|
| All forms TB prevalence per 100,000 per 100,000 population (CI)       | 121/7,780                       | 1555<br>(1280-1830) | 11/496                          | 2218<br>(917-3518) | 0.25        |
| Bacteriologically confirmed TB prevalence per 100,000 population (CI) | 79/7,763                        | 1018<br>(794- 1241) | 8/496                           | 1613<br>(500-2725) | 0.21        |
| DR TB prevalence                                                      | 3/76                            | 3.9<br>(0.8-10.7)   | 1/8                             | 12.5<br>(0.4-52.7) | 0.26        |
| HIV prevalence % (CI)                                                 | 1,119/7,722                     | 14.5<br>(13.7-15.3) | 52/462                          | 11.3<br>(8.4-14.1) | 0.05        |

STROBE Statement—Checklist of items that should be included in reports of *cross-sectional studies*

|                              | Item No | Recommendation                                                                                                                                                                                               | Page No |
|------------------------------|---------|--------------------------------------------------------------------------------------------------------------------------------------------------------------------------------------------------------------|---------|
| <b>Title and abstract</b>    | 1       | (a) Indicate the study's design with a commonly used term in the title or the abstract                                                                                                                       | 2       |
|                              |         | (b) Provide in the abstract an informative and balanced summary of what was done and what was found                                                                                                          | 2       |
| <b>Introduction</b>          |         |                                                                                                                                                                                                              |         |
| Background/rationale         | 2       | Explain the scientific background and rationale for the investigation being reported                                                                                                                         | 3       |
| Objectives                   | 3       | State specific objectives, including any prespecified hypotheses                                                                                                                                             | 3       |
| <b>Methods</b>               |         |                                                                                                                                                                                                              |         |
| Study design                 | 4       | Present key elements of study design early in the paper                                                                                                                                                      | 4       |
| Setting                      | 5       | Describe the setting, locations, and relevant dates, including periods of recruitment, exposure, follow-up, and data collection                                                                              | 4,5     |
| Participants                 | 6       | (a) Give the eligibility criteria, and the sources and methods of selection of participants                                                                                                                  | 5,6     |
| Variables                    | 7       | Clearly define all outcomes, exposures, predictors, potential confounders, and effect modifiers. Give diagnostic criteria, if applicable                                                                     | 6       |
| Data sources/<br>measurement | 8*      | For each variable of interest, give sources of data and details of methods of assessment (measurement). Describe comparability of assessment methods if there is more than one group                         | 5,6     |
| Bias                         | 9       | Describe any efforts to address potential sources of bias                                                                                                                                                    | 5       |
| Study size                   | 10      | Explain how the study size was arrived at                                                                                                                                                                    | 5       |
| Quantitative variables       | 11      | Explain how quantitative variables were handled in the analyses. If applicable, describe which groupings were chosen and why                                                                                 | 6       |
| Statistical methods          | 12      | (a) Describe all statistical methods, including those used to control for confounding                                                                                                                        | 6       |
|                              |         | (b) Describe any methods used to examine subgroups and interactions                                                                                                                                          | 6       |
|                              |         | (c) Explain how missing data were addressed                                                                                                                                                                  | 6       |
|                              |         | (d) If applicable, describe analytical methods taking account of sampling strategy                                                                                                                           |         |
|                              |         | (e) Describe any sensitivity analyses                                                                                                                                                                        |         |
| <b>Results</b>               |         |                                                                                                                                                                                                              |         |
| Participants                 | 13*     | (a) Report numbers of individuals at each stage of study—eg numbers potentially eligible, examined for eligibility, confirmed eligible, included in the study, completing follow-up, and analysed            | 8       |
|                              |         | (b) Give reasons for non-participation at each stage                                                                                                                                                         | 8       |
|                              |         | (c) Consider use of a flow diagram                                                                                                                                                                           | 8       |
| Descriptive data             | 14*     | (a) Give characteristics of study participants (eg demographic, clinical, social) and information on exposures and potential confounders                                                                     | 8,9     |
|                              |         | (b) Indicate number of participants with missing data for each variable of interest                                                                                                                          | 9-12    |
| Outcome data                 | 15*     | Report numbers of outcome events or summary measures                                                                                                                                                         | 9-12    |
| Main results                 | 16      | (a) Give unadjusted estimates and, if applicable, confounder-adjusted estimates and their precision (eg, 95% confidence interval). Make clear which confounders were adjusted for and why they were included |         |



|                          |    |                                                                                                                                                                            |       |
|--------------------------|----|----------------------------------------------------------------------------------------------------------------------------------------------------------------------------|-------|
|                          |    | (b) Report category boundaries when continuous variables were categorized                                                                                                  | 9-12  |
|                          |    | (c) If relevant, consider translating estimates of relative risk into absolute risk for a meaningful time period                                                           |       |
| Other analyses           | 17 | Report other analyses done—eg analyses of subgroups and interactions, and sensitivity analyses                                                                             | 9-12  |
| <b>Discussion</b>        |    |                                                                                                                                                                            |       |
| Key results              | 18 | Summarise key results with reference to study objectives                                                                                                                   | 12    |
| Limitations              | 19 | Discuss limitations of the study, taking into account sources of potential bias or imprecision. Discuss both direction and magnitude of any potential bias                 | 13    |
| Interpretation           | 20 | Give a cautious overall interpretation of results considering objectives, limitations, multiplicity of analyses, results from similar studies, and other relevant evidence | 12-13 |
| Generalisability         | 21 | Discuss the generalisability (external validity) of the study results                                                                                                      | 13    |
| <b>Other information</b> |    |                                                                                                                                                                            |       |
| Funding                  | 22 | Give the source of funding and the role of the funders for the present study and, if applicable, for the original study on which the present article is based              | 15    |

\*Give information separately for exposed and unexposed groups.

**Note:** An Explanation and Elaboration article discusses each checklist item and gives methodological background and published examples of transparent reporting. The STROBE checklist is best used in conjunction with this article (freely available on the Web sites of PLoS Medicine at <http://www.plosmedicine.org/>, Annals of Internal Medicine at <http://www.annals.org/>, and Epidemiology at <http://www.epidem.com/>). Information on the STROBE Initiative is available at [www.strobe-statement.org](http://www.strobe-statement.org).

# BMJ Open

## A cross sectional assessment of Tuberculosis and Human Immunodeficiency Virus prevalence in 13 correctional facilities in Zambia

|                                 |                                                                                                                                                                                                                                                                                                                                                                                                                                                                                                                                                                                                                                                                                                                                                                                                     |
|---------------------------------|-----------------------------------------------------------------------------------------------------------------------------------------------------------------------------------------------------------------------------------------------------------------------------------------------------------------------------------------------------------------------------------------------------------------------------------------------------------------------------------------------------------------------------------------------------------------------------------------------------------------------------------------------------------------------------------------------------------------------------------------------------------------------------------------------------|
| Journal:                        | <i>BMJ Open</i>                                                                                                                                                                                                                                                                                                                                                                                                                                                                                                                                                                                                                                                                                                                                                                                     |
| Manuscript ID                   | bmjopen-2021-052221.R1                                                                                                                                                                                                                                                                                                                                                                                                                                                                                                                                                                                                                                                                                                                                                                              |
| Article Type:                   | Original research                                                                                                                                                                                                                                                                                                                                                                                                                                                                                                                                                                                                                                                                                                                                                                                   |
| Date Submitted by the Author:   | 23-Jun-2021                                                                                                                                                                                                                                                                                                                                                                                                                                                                                                                                                                                                                                                                                                                                                                                         |
| Complete List of Authors:       | Kagujje, Mary; Center for Infectious Disease Research in Zambia, Tuberculosis department<br>Somwe, Paul; Center for Infectious Disease Research in Zambia, Strategic Information department<br>Hatwiinda, Sisa; Center for Infectious Disease Research in Zambia, Tuberculosis department<br>Bwalya, Joel; Center for Infectious Disease Research in Zambia, Strategic Information department<br>Zgambo, Tamala; Zambia Correctional Service<br>Thornicroft, Moomba; Center for Infectious Disease Research in Zambia, Tuberculosis department<br>Bozzani, Fiammetta; London School of Hygiene and Tropical Medicine Faculty of Public Health and Policy<br>Moonga, Clement; Center for Infectious Disease Research in Zambia<br>Muyoyeta, Monde ; Center for Infectious Disease Research in Zambia |
| <b>Primary Subject Heading</b>: | Epidemiology                                                                                                                                                                                                                                                                                                                                                                                                                                                                                                                                                                                                                                                                                                                                                                                        |
| Secondary Subject Heading:      | Infectious diseases                                                                                                                                                                                                                                                                                                                                                                                                                                                                                                                                                                                                                                                                                                                                                                                 |
| Keywords:                       | Tuberculosis < INFECTIOUS DISEASES, HIV & AIDS < INFECTIOUS DISEASES, EPIDEMIOLOGY, PUBLIC HEALTH                                                                                                                                                                                                                                                                                                                                                                                                                                                                                                                                                                                                                                                                                                   |
|                                 |                                                                                                                                                                                                                                                                                                                                                                                                                                                                                                                                                                                                                                                                                                                                                                                                     |

SCHOLARONE™  
Manuscripts

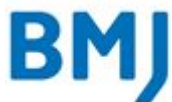

I, the Submitting Author has the right to grant and does grant on behalf of all authors of the Work (as defined in the below author licence), an exclusive licence and/or a non-exclusive licence for contributions from authors who are: i) UK Crown employees; ii) where BMJ has agreed a CC-BY licence shall apply, and/or iii) in accordance with the terms applicable for US Federal Government officers or employees acting as part of their official duties; on a worldwide, perpetual, irrevocable, royalty-free basis to BMJ Publishing Group Ltd ("BMJ") its licensees and where the relevant Journal is co-owned by BMJ to the co-owners of the Journal, to publish the Work in this journal and any other BMJ products and to exploit all rights, as set out in our [licence](#).

The Submitting Author accepts and understands that any supply made under these terms is made by BMJ to the Submitting Author unless you are acting as an employee on behalf of your employer or a postgraduate student of an affiliated institution which is paying any applicable article publishing charge ("APC") for Open Access articles. Where the Submitting Author wishes to make the Work available on an Open Access basis (and intends to pay the relevant APC), the terms of reuse of such Open Access shall be governed by a Creative Commons licence – details of these licences and which [Creative Commons](#) licence will apply to this Work are set out in our licence referred to above.

Other than as permitted in any relevant BMJ Author's Self Archiving Policies, I confirm this Work has not been accepted for publication elsewhere, is not being considered for publication elsewhere and does not duplicate material already published. I confirm all authors consent to publication of this Work and authorise the granting of this licence.

1  
2  
3  
4 1 **A cross sectional assessment of Tuberculosis and Human**  
5  
6 2 **Immunodeficiency Virus prevalence in 13 correctional**  
7  
8 3 **facilities in Zambia**  
9  
10 4

11  
12 5 Mary Kagujje ([0000-0003-4818-6548](tel:0000-0003-4818-6548))<sup>1</sup>, Paul Somwe<sup>2</sup>, Sisa Hatwiinda<sup>1</sup>, Joel Bwalya<sup>2</sup>, Tamala  
13  
14 6 Zgambo<sup>3</sup>, Moomba Thornicroft<sup>1</sup>, Fiammetta Bozzani<sup>4</sup>, Clement Nchimunya Moonga<sup>1</sup>, Monde  
15  
16 7 Muyoyeta<sup>1</sup>  
17  
18  
19

20 8 **Author affiliations**

- 21  
22 9 1. Tuberculosis department, Centre for Infectious Disease Research in Zambia, P.O. Box 34681  
23  
24 10 Lusaka, Zambia 10101  
25  
26 11 2. Strategic Information department, Centre for Infectious Disease Research in Zambia, P.O. Box  
27  
28 12 34681 Lusaka, Zambia 10101  
29  
30 13 3. Zambia Correctional Service, P.O. Box 80926 Kabwe, Zambia 10101  
31  
32 14 4. London School of Hygiene and Tropical Medicine, Keppel Street London WC1E 7HT, United  
33  
34 15 Kingdom  
35  
36  
37  
38  
39  
40

41 17 Correspondence to Mary Kagujje; [mkagujje@gmail.com](mailto:mkagujje@gmail.com)  
42  
43  
44 18

45  
46 19 **Key words:** Correctional facilities, Tuberculosis, HIV, Zambia  
47  
48  
49  
50  
51  
52 21  
53  
54  
55  
56  
57  
58  
59  
60

## 22 ABSTRACT

23 **Objective:** To determine the prevalence of Tuberculosis (TB) and Human Immunodeficiency  
24 virus (HIV) in 13 Zambian correctional facilities.

25 **Methods:** Cross sectional study

26 **Setting:** 13 correctional facilities in 7 of the 10 provinces in Zambia.

27 **Participants:** All incarcerated individuals were eligible for TB and HIV screening and testing.

28 Of the total study population of 9,695 individuals, which represent 46.2% of total correctional  
29 population at the beginning of the study, 8,267 and 8,160 were screened for TB and HIV  
30 respectively.

31 **Interventions:** TB and HIV screening and testing was done between July 2018 and February  
32 2019.

33 **Primary outcome measures:** All forms of TB, bacteriologically confirmed TB, drug resistant  
34 TB, HIV

35 **Results:** Prevalence of all forms of TB and bacteriologically confirmed TB was 1598 per  
36 100,000 population and 1056 per 100,000 population, respectively. Among those with  
37 bacteriologically confirmed TB, 4.6% had drug resistant TB. The prevalence of HIV was 14.3%.

38 **Conclusion:** Compared to the study in 2011 which screened inmates representing 30% of the  
39 country's inmate population then, the prevalence of all forms of TB and HIV in correctional  
40 facilities has reduced by about 75% and 8.6% respectively. However, compared to the general  
41 population, the prevalence of all forms of TB and HIV was 3.5 and 1.3 times higher,  
42 respectively. TB/HIV programs in correctional facilities need further strengthening.

## ARTICLE SUMMARY

### Strengths and limitations of this study

- This is the only study on prevalence of TB and HIV in Zambian correctional facilities in the past 8 years.
- Results are generalisable to the 13 correctional facilities as a large sample was screened for TB and HIV.
- Data disaggregates can inform targeted interventions to reduce the burden of both diseases.
- Variations in TB screening algorithms could have underestimated TB prevalence.
- Asymptomatic TB was not consistently screened for.

## 54 INTRODUCTION

55 Globally, correctional facilities are disproportionately affected by tuberculosis (TB) and the  
56 Human Immunodeficiency Virus (HIV). (1-3) In some correctional facilities: the prevalence of  
57 TB has been reported to be up to 100 times higher than the prevalence in the general  
58 population (1) while the prevalence of HIV has been reported to be up to 23 times higher  
59 than the prevalence in the general population(3). The poor living conditions in correctional  
60 facilities perpetuate TB and HIV. While overcrowding, poor ventilation, HIV, poor nutrition  
61 and late case detection perpetuate TB; sexual violence, sharing of sharp objects and lack of  
62 access to condoms perpetuate HIV. (4, 5) Additionally, incarcerated people often come from  
63 socio-economically disadvantaged backgrounds where the burden of TB and HIV is already  
64 high. (1, 3)

65  
66 In 2011, the prevalence of all forms of TB in 6 Zambian correctional facilities representing 30%  
67 of the total incarcerated population was 6,428 per 100,000 population, which was 18 times  
68 higher than the national estimates. (6) In the same study, 0.6% of those with bacteriologically  
69 confirmed TB had rifampicin-resistant TB and the overall prevalence of HIV was 22.9%, which  
70 was 1.5 times the national prevalence.

71  
72 Since the last documented prevalence survey, several interventions including test and treat  
73 for HIV, health systems strengthening, nutritional support, TB and HIV entry screening, among  
74 others, have been put in place to control the burden of TB and its associated risk factors in  
75 Zambia correctional facilities. (7-10)

76

1  
2  
3 77 This study aimed to determine current prevalence of all forms of TB, bacteriologically  
4  
5 78 confirmed TB, and drug resistant (DR) TB and the prevalence of HIV in 13 Zambian correctional  
6  
7  
8 79 facilities.  
9

## 10 11 12 80 **METHODS** 13 14 15

### 16 17 81 **Study design** 18 19

20  
21 82 We present an analysis of cross-sectional data collected under programmatic conditions by  
22  
23 83 the Elton John Juvenile Offenders' health (EJJOH) project. The EJJOH project was a health  
24  
25 84 system strengthening project aimed at supporting provision of holistic and integrated health  
26  
27 85 services to juvenile offenders. While the project primarily targeted juveniles, where these  
28  
29 86 were held in adults' facilities, support was extended to incarcerated adults in relation to  
30  
31 87 infectious disease control. The project screened as part of its baseline assessment.  
32  
33  
34  
35

### 36 37 88 **Study setting and population** 38 39

40  
41 89 Zambia has 87 correctional facilities with a total capacity of 9,150 incarcerated individuals.  
42  
43 90 (11) However, the total incarcerated population in Zambia was slightly over 21,000 in 2018  
44  
45 91 and 22,823 in 2019. In 2019, almost one in five individuals detained was in pre-trial detention.  
46  
47 92 (11) The data was collected between July 2018 and February 2019 in 13 correctional facilities  
48  
49 93 with a combined population of 9,695, representing 46.2% of the total correctional facility  
50  
51 94 population in Zambia in 2018. The 13 correctional facilities had been purposefully selected by  
52  
53 95 the EJJOH project because they held a significant number of juveniles. The facilities include;  
54  
55 96 Lusaka Central, Kamwala Remand, Livingstone Central, Katombora Reformatory School,  
56  
57  
58  
59  
60



1  
2  
3 97 Nakambala Approved school, Mukobeko Medium, Ndola remand, Kamfinsa State, Chingola,  
4  
5 98 Insakwe Approved School, Chipata Central, Mongu Central and Kasama Central (locations  
6  
7  
8 99 shown in Supplementary Figure 1). The Reformatory and approved schools hold ordered  
9  
10 100 (convicted) juveniles (persons less than 19 years old)(12); the other facilities are intended only  
11  
12  
13 101 for adults and circumstantial children(13) but also hold juveniles who are still undergoing  
14  
15 102 trial.

16  
17 103  
18  
19  
20 104 Across Zambia, routinely, incarcerated people should undergo universal TB screening and HIV  
21  
22 105 testing at entry or within 7 days of admission into correctional facilities. However, in some  
23  
24 106 facilities entry screening is not done due to various constraints. Depending on availability of  
25  
26 107 logistics, periodic TB and HIV mass screening are carried out, with freedom to opt out of HIV  
27  
28 108 testing but not TB screening and testing. TB screening is mandatory to increase early TB  
29  
30 109 detection and treatment so as to protect other inmates from TB.

31  
32  
33  
34  
35 110

## 36 37 38 111 **Study Procedures**

39  
40  
41  
42 112 A project specific register was used; it was a modification of the National Presumptive TB  
43  
44 113 register with additional data elements on entry point, category of individual and previous  
45  
46 114 history of TB. All inmates were screened for TB; those who did not opt out were tested for  
47  
48 115 HIV. The screening point was documented under one of the following categories: mass  
49  
50 116 screening, entry screening from the community or entry screening transfer from other  
51  
52 117 correctional facility. The categories of individuals included adults and juveniles. Those already  
53  
54 118 on anti-TB treatment at the time of screening were documented as TB cases and those on  
55  
56 119 anti-retroviral therapy (ART) were recorded as HIV positive and were not retested. Those with

1  
2  
3 120 cough, fever, weight loss, night sweats, chest pain and shortness of breath, irrespective of  
4  
5  
6 121 duration, were considered presumptive TB patients and submitted sputum for testing using  
7  
8 122 GeneXpert (Xpert MTB/Rif Assay. Cepheid, Sunnyvale, California, USA). Symptomatic  
9  
10 123 individuals with a negative GeneXpert were referred for Chest x-ray (CXR) depending on the  
11  
12  
13 124 clinician's discretion. There were 3 variations to this algorithm: 1) In Lusaka central, a random  
14  
15 125 proportion of the incarcerated population received CXR in addition to symptoms screening  
16  
17 126 and those with either abnormal CXR or symptoms submitted sputum for GeneXpert; 2) at  
18  
19  
20 127 Ndola remand, all except those already on TB treatment submitted sputum irrespective of  
21  
22  
23 128 symptoms; and 3) in Kabwe medium, Fluorescent Microscopy (FM) was used for sputum  
24  
25 129 examination instead of GeneXpert.

26  
27  
28 130  
29  
30 131 Alere Determine™ HIV-1/2 test (AlereHIV-1/2; Abbott, Chicago, IL, USA) was used for HIV  
31  
32 132 screening and SD-Bioline HIV-1/2 (SD-Bioline HIV-1/2; Abbott, Chicago, IL, USA) for  
33  
34 133 confirmation of positive screening test, following the standard Zambian HIV testing algorithm.  
35  
36  
37 134 All individuals received pre- and post-test HIV counselling. HIV positive inmates were  
38  
39  
40 135 commenced on ART within 1-2 days.

## 41 42 43 136 **Data analysis**

44  
45  
46  
47 137 STATA Statistical Software (Stata Corporation Version 14. College Station, Texas 77845, USA)  
48  
49 138 was used for data analysis. A descriptive analysis was done to determine the characteristics  
50  
51 139 of the population screened and the prevalence of TB and HIV; overall prevalence and  
52  
53 140 prevalence among subgroups was determined. The prevalence of all forms of TB included  
54  
55 141 bacteriologically confirmed TB and clinically diagnosed TB. Bacteriologically confirmed TB  
56  
57  
58 142 prevalence included those who had a positive GeneXpert or FM result, while patients already  
59  
60

1  
2  
3 143 on TB treatment at time of screening were excluded from this analysis since data on the type  
4  
5 144 of TB had not been collected. DR TB prevalence included incarcerated people with rifampicin  
6  
7  
8 145 resistance on GeneXpert. Missing data was excluded from the analysis.  
9

10  
11 146 Additionally, a chi-square test was done to determine if there was a statistically significant  
12  
13 147 difference in prevalence of TB and HIV between residents and new entrants into correctional  
14  
15 148 facilities. New entrants were defined as incarcerated people whose entry point was entry  
16  
17 149 screening from community while residents were defined as those whose entry point was  
18  
19 150 either mass screening or entry screening transfer from other correctional facility.  
20  
21  
22  
23

## 24 25 151 **Patient and Public involvement**

26  
27  
28 152 The development of the research questions was intended to inform priority setting by the  
29  
30 153 EJJOH project based on the disease burden in correctional facilities. The incarcerated  
31  
32 154 population were not involved in the design of the project. The correctional health committee  
33  
34 155 constituting of the incarcerated persons, correctional officers and health care workers were  
35  
36 156 involved in the data collection. A representative of the correctional health committee at each  
37  
38 157 correctional facility participated in the dissemination meeting on project findings.  
39  
40  
41  
42

43 158  
44  
45

## 46 47 159 **RESULTS**

### 48 49 160 **Flow diagram and participant characteristics**

50  
51  
52  
53 161 Of the total adult and juvenile population of 9,695 in the 13 correctional facilities, 8160  
54  
55 162 (84.2%) were screened for HIV and 8,267(85.3%) were screened for TB (Figure 1). Individuals  
56  
57  
58  
59  
60

1  
2  
3 163 not screened were 1,428 (14.7%) and they constituted those either in court or the farms. Of  
4  
5  
6 164 those screened for HIV, 1170(14.3%) were HIV positive, of which 816 were known positive  
7  
8 165 and 354 were new positives, while 6,990 (85.7%) were HIV negative. Of those screened for  
9  
10 166 TB, 17(0.2%) were already on treatment, 3,076 (37.3%) individuals had symptoms of TB, 5,161  
11  
12 167 (62.5%) were asymptomatic while 13 (0.2%) had missing data. A total of 4,269 individuals had  
13  
14 168 documented sputum results. Eighty seven (87) bacteriologically confirmed TB cases were  
15  
16 169 reported including 25(28.7%) asymptomatic individuals 62(71.3%) symptomatic individuals. A  
17  
18 170 total of 132 TB cases were identified including 87 (65.9%) bacteriologically confirmed TB  
19  
20 171 cases, 28 (21.2%) clinically diagnosed TB cases and the 17 (12.9%) that were already on TB  
21  
22 172 treatment at the time of screening.

23  
24  
25  
26  
27 173 Figure 1: Flow diagram of TB screening and diagnosis

28  
29  
30 174  
31  
32  
33 175 Of those screened, 7,805 (94.41%) were adults and 462 (5.58%) were juveniles (Table 1). The  
34  
35 176 overall median age (interquartile range (IQR)) of the participants was 32 years (IQR 10-93);  
36  
37 177 the median ages for the adults and juveniles were 33(IQR 19-93) and 17(IQR 10-18)  
38  
39 178 respectively. The males were 8,167 (98.79%), participants with a history of previous TB were  
40  
41 179 467 (5.65%), resident inmates were 7,767 (93.95%) while new entrants were 497 (6.01%).

42  
43  
44  
45 180 Table 1: Characteristics of population screened

| Variable               | Participants (n= 8267) |
|------------------------|------------------------|
| Category of individual | n (%)                  |
| Adults                 | 7,805 (94.41%)         |
| Juveniles              | 462 (5.58%)            |
| Median Age (IQR)       |                        |
| Overall                | 32(10-93)              |
| Adults (≥19 years)     | 33 (19-93)             |

|                                             |                |
|---------------------------------------------|----------------|
| Juveniles (<19 years)                       | 17 (10-18)     |
| Sex                                         | n (%)          |
| Male                                        | 8,167 (98.79%) |
| Female                                      | 89 (1.08%)     |
| Missing                                     | 11 (0.13%)     |
| History of previous TB                      | n (%)          |
| Yes                                         | 467 (5.65%)    |
| No                                          | 7,786 (94.18%) |
| Missing                                     | 14 (0.17%)     |
| Type of screening visit                     | n (%)          |
| Mass screening                              | 7,602 (91.92%) |
| Entry screening other correctional facility | 165 (2.00%)    |
| Entry screening community                   | 497 (6.01%)    |
| Missing                                     | 3 (0.04%)      |

Abbreviations: IQR- Interquartile range, TB- Tuberculosis

### Prevalence of all forms of TB and bacteriologically confirmed TB

The overall prevalence of all forms of TB was 1,598 (1339-1892) per 100,000 population while the overall prevalence of bacteriologically confirmed TB was 1,056 (844-1301) per 100,000 population (Table 2). There was no statistically significant difference in the prevalence of both all forms of TB and bacteriologically confirmed TB between males and females, ( $p=0.51$ ) and ( $p=1.00$ ) respectively. It was the same for adults and juveniles ( $p= 0.82$ ) and ( $p= 0.23$ ) respectively and the new entrants and residents ( $p=0.25$ ) and ( $p=0.21$ ) respectively.

Table 2: Prevalence of all forms of TB and bacteriologically confirmed TB

|         | Cases/<br>Participants<br>(n/N) | Prevalence<br>of all forms<br>of TB per<br>100,000 (CI) | p-<br>value | Cases/<br>Participants<br>(n/N) | Prevalence of<br>Bacteriologically<br>confirmed TB<br>per 100,000 (CI) | p-<br>value |
|---------|---------------------------------|---------------------------------------------------------|-------------|---------------------------------|------------------------------------------------------------------------|-------------|
| Overall | 132/8,254 <sup>1</sup>          | 1599<br>(1340-1894)                                     |             | 87/8,237 <sup>1,2</sup>         | 1056<br>(847-1301)                                                     |             |

| Sex                        |           |                      |      |          |                    |      |
|----------------------------|-----------|----------------------|------|----------|--------------------|------|
| Male                       | 129/8,154 | 1582<br>(1322-1877)  | 0.60 | 84/8,137 | 1032<br>(824-1276) | 0.79 |
| Female                     | 1/89      | 1124<br>(28- 6102)   |      | 1/89     | 1124<br>(28- 6102) |      |
| Missing gender             | 2/11      |                      |      | 2/11     |                    |      |
| Category of individual     |           |                      |      |          |                    |      |
| Adult (≥19 years)          | 124/7,792 | 1591<br>(1325- 1894) | 0.82 | 79/7,775 | 1016<br>(805-1265) | 0.23 |
| Juvenile (<19 years)       | 8/462     | 1732<br>(750-3383)   |      | 8/462    | 1732<br>(750-3383) |      |
| Entry point <sup>1,3</sup> |           |                      |      |          |                    |      |
| Residents                  | 121/ 7757 | 1560<br>(1296- 1861) | 0.25 | 79/7740  | 1020<br>(809-1270) | 0.21 |
| New entrants               | 11/494    | 2227<br>(1117-3949)  |      | 8/494    | 1619<br>(702-3166) |      |

Abbreviations: CI- Confidence interval, TB- Tuberculosis

Residents include those screened through mass screening and those under entry screening as a transfer from other correctional facility.

New entrants include those screened under entry screening from the community (police cells).

<sup>1</sup> Thirteen (13) participants had missing values on TB.

<sup>2</sup> Seventeen participants were already on TB treatment, bacteriological status unknown

<sup>3</sup>Three (3) participants had missing values on entry point

## 198 Prevalence of DR TB

199 Among the bacteriologically confirmed TB cases, the overall prevalence of DR TB was 4.6%  
 200 (1.3%-11.4%) (Table 3). There was no statistically significant difference in prevalence of DR TB  
 201 between males and females ( $p=0.95$ ), between adults and juveniles ( $p=0.68$ ), between those  
 202 with and those without previous history of TB ( $p=0.72$ ) and between the new entrants and  
 203 residents( $p=0.26$ ).

204 Table 3: Prevalence of drug resistant TB

|                               | <b>Cases/<br/>Participants<br/>(n/N)</b> | <b>Prevalence of DR TB<br/>% (CI)</b> | <b>p-value</b> |
|-------------------------------|------------------------------------------|---------------------------------------|----------------|
| Overall                       | 4/87                                     | 4.6 (1.3-11.4)                        |                |
| <b>Sex</b>                    |                                          |                                       |                |
| Male                          | 4/84                                     | 4.8 (1.3-11.7)                        | 0.95           |
| Female                        | 0/1                                      | 0 (0- 97.5) *                         |                |
| Missing                       | 0/2                                      |                                       |                |
| <b>Category of individual</b> |                                          |                                       |                |
| Adults (≥19 years)            | 4/79                                     | 5.1 (1.4- 12.5)                       | 0.68           |
| Juveniles (<19 years)         | 0/8                                      | 0 (0-3.7) *                           |                |
| <b>Previous History of TB</b> |                                          |                                       |                |
| No                            | 3/64                                     | 4.7 (1.0-13.1)                        | 0.72           |
| Yes                           | 1/23                                     | 4.3 (0.1- 21.9)                       |                |
| <b>Entry point</b>            |                                          |                                       |                |
| Residents                     | 3/76                                     | 3.8 (0.8-10.7)                        | 0.26           |
| New entrants                  | 1/8                                      | 12.5 (0.3-52.7)                       |                |

205 Abbreviations: DR TB- Drug Resistant Tuberculosis CI- Confidence interval  
 206 Residents include those screened through mass screening and those under entry screening as a transfer from  
 207 other correctional facility.  
 208 New incarcerated individuals include those screened under entry screening from the community (police cells).  
 209 \* one-sided, 97.5% confidence interval  
 210

## 211 Prevalence of HIV

212 The overall HIV prevalence was 14.3% (13.6%-15.1%) (Table 4). The prevalence of HIV among  
 213 males was 14.1% (13.4%-14.9%) and among females 25.0% (16.6%-35.1%) ( $p=0.01$ ). The  
 214 prevalence of HIV among adults and juveniles was 15.0% (14.1%-15.7%) and 3.9% (2.3%-  
 215 6.2%) ( $p<0.01$ ) respectively. There was no statistically significant differences in prevalence of  
 216 HIV between residents and new entrants ( $p=0.05$ ).

217 Table 4: Prevalence of HIV

|  | <b>Cases/ Participants<br/>(n/N)</b> | <b>Prevalence of HIV<br/>% (CI)</b> | <b>p-value</b> |
|--|--------------------------------------|-------------------------------------|----------------|
|--|--------------------------------------|-------------------------------------|----------------|

|                            |                          |                  |      |
|----------------------------|--------------------------|------------------|------|
| Overall                    | 1,170/8,160 <sup>f</sup> | 14.3 (13.6-15.1) |      |
| Sex                        |                          |                  |      |
| Male                       | 1,139/8,061              | 14.1 (13.4-14.9) | 0.00 |
| Female                     | 23/89                    | 25.8 (17.4-36.2) |      |
| Missing sex                | 8/10                     |                  |      |
| Category of individual     |                          |                  |      |
| Adults (≥19 years)         | 1,153/7,727              | 15.0 (14.1-15.7) | 0.00 |
| Juveniles (<19 years)      | 17/433                   | 3.9 (2.3- 6.2)   |      |
| Entry point <sup>1,2</sup> |                          |                  |      |
| Residents                  | 1,118/7699               | 14.5(13.7-15.3)  | 0.06 |
| New entrants               | 52/460                   | 11.3 (8.6-14.6)  |      |

218 Abbreviations: CI- Confidence interval, HIV- Human Immunodeficiency virus  
 219 Residents include those screened through mass screening and those under entry screening as a transfer from  
 220 other correctional facility. New incarcerated individuals include those screened under entry screening from the  
 221 community (police cells).  
 222 <sup>1</sup>One hundred and seven (107) participants either opted out of HIV testing or had missing data  
 223 <sup>2</sup>Three (3) participants had missing entry point, 2 of which also had missing HIV status  
 224 (\*) one-sided, 97.5% confidence interval.  
 225 \*\* not determined.  
 226

## 227 DISCUSSION

### 228 Statement of principal findings

229 This study found that in Zambian correctional facilities, the prevalence of all forms of TB,  
 230 bacteriologically confirmed TB and DR TB were 3.5 times higher, 1.7 times higher and almost  
 231 twice as high as in the general population, respectively. (14, 15) Additionally, the prevalence  
 232 of HIV was 1.3 times higher than the prevalence in the general population (16). 28.7% of the  
 233 bacteriologically confirmed TB cases were asymptomatic.

### 234 Study findings in relation to other studies



1  
2  
3 235 It is noteworthy that there is no statistically significant difference in prevalence of all forms  
4  
5  
6 236 TB and bacteriologically confirmed TB between juveniles and adults and that in fact the point  
7  
8 237 estimates for TB in juveniles were higher; generally older adults have a higher TB burden than  
9  
10 238 adolescents and young adults. (17, 18) This suggests that the disproportionate access to TB  
11  
12  
13 239 services and health services in general among juveniles in Zambian correctional facilities  
14  
15 240 reported between 2009-2010 have persisted. (19) Another significant contrast relative to the  
16  
17  
18 241 general population is the absence of a statistically significant difference in prevalence of  
19  
20 242 bacteriologically confirmed TB between males and females. (15) This could be due to absence  
21  
22  
23 243 of gender related differences in exposure to risk factors for TB infection and disease but could  
24  
25 244 also be due to the small sample size and very wide confidence intervals among females.  
26  
27  
28 245  
29  
30 246 In comparison to the 2010-2011 study, the prevalence of all forms of TB has reduced by about  
31  
32 247 75% while the prevalence of bacteriologically confirmed TB has reduced by 50%. (6) The  
33  
34  
35 248 reduction in prevalence of all forms of TB and bacteriologically confirmed TB could be a result  
36  
37 249 of the TB control interventions being implemented within the Zambian correctional facilities.  
38  
39  
40 250 However, it could also be in part because the correctional facilities in the two studies are not  
41  
42 251 the same and the variations in the sensitivity of screening algorithms as a more sensitive  
43  
44  
45 252 algorithm involving x-ray and culture(20, 21) for all inmates was used in the previous study.  
46  
47 253 An observational and modelling study done in Brazil supports the hypothesis of effectiveness  
48  
49  
50 254 of TB control interventions being implemented: entry screening, active screening for TB  
51  
52 255 among inmates, TB preventive therapy and annual mass screening independently reduce the  
53  
54 256 incidence of TB in correctional facilities by 10.3%, 35%, 23.5% and 47.5% respectively after a  
55  
56  
57 257 period of 10 years and a combination of these interventions reduces the TB incidence by  
58  
59 258 79.2% after a period of 10 years. (22). Other countries in sub-Saharan Africa with results  
60

1  
2  
3 259 involving multiple correctional facilities report TB prevalence ranging from 457 - 888 per  
4  
5  
6 260 100,000 population. (23-25) However, a direct comparison to the prevalence reported in the  
7  
8 261 other countries can't be done due to differences in definitions of TB used.  
9

10  
11 262

12  
13 263 The prevalence of DR TB among people with no history of TB is similar to the prevalence  
14  
15 264 among people with previous history of TB, suggesting significant transmission of DR TB either  
16  
17 265 in correctional facilities or in the communities where the incarcerated people come from, or  
18  
19  
20 266 both. Strengthening TB infection control can reduce transmission of DR TB. (26) In comparison  
21  
22 267 to the 2010-2011 study, the prevalence of DR TB has increased by 4%. (6) The increasing trend  
23  
24  
25 268 of DR TB in the Zambian correctional facility setting is also seen at the global and national  
26  
27  
28 269 levels.(27) The prevalence of DR TB in this study can't be directly compared to other  
29  
30 270 correctional facility settings since the forms of drug resistance reported are different. (28-30)

31  
32 271

33  
34  
35 272 Similar to the national picture, the prevalence of HIV was higher among adults than juveniles  
36  
37 273 and was higher among females than males. (16) However, the prevalence of HIV in women  
38  
39  
40 274 relative to the prevalence of HIV in men is much higher in the incarcerated population than  
41  
42 275 the general population because women with HIV risk factors like sex worker status, intimate  
43  
44 276 partner violence, drug and substance abuse are overrepresented in this population. (31)

45  
46  
47 277 Despite the very high rates of HIV in this group, relative to the study done by Simooya et al in  
48  
49 278 1999 which showed a prevalence of 33% in females, the prevalence of HIV has reduced.(32)

50  
51  
52 279 There has been an 8.6% reduction in overall prevalence of HIV since the study in 2010-2011.

53  
54 280 (6) The reduction in prevalence of HIV in correctional facilities is attributable to the reduction  
55  
56  
57 281 of HIV prevalence in the general population(16), the implementation of test and treat across  
58  
59 282 Zambia(33), entry HIV testing and treatment(6) and use of correctional health committees to

1  
2  
3 283 strengthen TB/HIV service delivery at facility level(9). Among African countries with studies  
4  
5 284 involving several correctional facilities, Zambia's prevalence is lower than South Africa's (25)  
6  
7  
8 285 but higher than Burkina Faso and Uganda.  
9

10 286

11  
12  
13 287 The difference in prevalence of TB and HIV between residents and new entrants into  
14  
15 288 correctional facilities was not statistically significant. This is possibly due to the following  
16  
17 289 reasons: a) individuals entering correctional facilities come from socio-economically  
18  
19  
20 290 disadvantaged backgrounds where prevalence of TB and HIV are already high (1); b) there are  
21  
22 291 high rates of recidivism (34); and c) detainees spend long periods in police cells, which have  
23  
24  
25 292 similar conditions to the correctional facilities (35, 36). However, the small sample size and  
26  
27 293 wide confidence intervals especially for the new entrants is a limiting factor for drawing any  
28  
29  
30 294 inferences from this comparison.  
31  
32

### 33 295 **Strengths and limitations**

34  
35  
36 296 This study provides the most recent evidence on prevalence of TB and HIV in Zambian  
37  
38 297 correctional facilities. The results of this study are generalizable to the 13 correctional  
39  
40 298 facilities, as a large sample representing 85% and 84% of the correctional facility population,  
41  
42  
43 299 was screened for TB and HIV respectively. By virtue of the data being disaggregated, it  
44  
45  
46 300 provides an opportunity for targeting of interventions that can reduce the burden of both  
47  
48 301 diseases. However, there were variations in the strength of screening algorithms for TB, hence  
49  
50 302 the prevalence of TB could have been underestimated in some correctional facilities. That  
51  
52  
53 303 said, among all forms TB cases, it is possible that some of the clinically diagnosed TB cases  
54  
55 304 might not be true TB cases as there are other differential causes of chest x-ray abnormalities  
56  
57  
58 305 that mimic TB. Inmates in court or on the farms were not screened for TB which could have  
59  
60

1  
2  
3 306 introduced bias during data collection. Additionally, asymptomatic TB was not consistently  
4  
5  
6 307 screened for.  
7

8 308  
9

## 10 11 12 309 **CONCLUSION** 13 14 15

16 310 Despite significant progress over the last decade in controlling TB and HIV in Zambian  
17  
18 311 correctional facilities, these continue to be disproportionately affected by both diseases.  
19  
20 312 TB/HIV programs in correctional facilities need further strengthening including aspects of  
21  
22 313 juvenile specific TB programming and gender responsive HIV programming. Additionally,  
23  
24 314 there is need to consider use of more sensitive algorithms that include chest x-ray to minimize  
25  
26 315 the risk of missing asymptomatic TB cases. Additional studies are required to determine the  
27  
28 316 true prevalence of asymptomatic TB in correctional facilities, to better understand the reason  
29  
30 317 for high HIV burden among females in correctional facilities and to determine the prevalence  
31  
32 318 of TB and HIV using a sample whose results can be generalized to all the correctional facilities  
33  
34 319 in Zambia.  
35  
36  
37  
38  
39  
40  
41

## 42 320 **ETHICS STATEMENT** 43 44 45

46 321 Approval to use the programmatic data was obtained from the University of Zambia  
47  
48 322 Biomedical Research Ethics Committee No: 018-11-18 and the London School of Hygiene and  
49  
50 323 Tropical Medicine Ethics Committee No: 21332. Since data was collected under programmatic  
51  
52 324 conditions, no consent was sought for TB screening and verbal consent and assent were  
53  
54 325 obtained for HIV testing. The EJJOH project had obtained permission from the Zambia  
55  
56 326 Correctional service and the Ministry of Community Development and Social services to  
57  
58  
59  
60

1  
2  
3 327 conduct the screening activities including testing of juveniles. When migrating data from the  
4  
5  
6 328 paper-based registers to the electronic database, participant identifying information was  
7  
8 329 excluded.  
9  
10  
11

## 12 330 REFERENCES

- 14 331 1. World Health Organization. Tuberculosis in Prisons [cited 2020 20th July 2020]. Available  
15 332 from: <https://www.who.int/tb/areas-of-work/population-groups/prisons-facts/en/>.
- 16 333 2. Telisinghe L, Charalambous S, Topp SM, Herce ME, Hoffmann CJ, Barron P, et al. HIV and  
17 334 tuberculosis in prisons in sub-Saharan Africa. *The Lancet*. 2016;388(10050):1215-27.
- 18 335 3. Dolan K, Wirtz AL, Moazen B, Ndeffo-Mbah M, Galvani A, Kinner SA, et al. Global burden of  
19 336 HIV, viral hepatitis, and tuberculosis in prisoners and detainees. *The Lancet*. 2016;388(10049):1089-  
20 337 102.
- 22 338 4. Reid SE, Topp SM, Turnbull ER, Hatwiinda S, Harris JB, Maggard KR, et al. Tuberculosis and  
23 339 HIV control in sub-Saharan African prisons: "thinking outside the prison cell". *Journal of Infectious*  
24 340 *Diseases*. 2012;205(suppl\_2):S265-S73.
- 25 341 5. World Health Organization Regional Office for Europe. Prisons and health. Copenhagen,  
26 342 Denmark 2014. 45-70, 83 p.
- 28 343 6. Maggard KR, Hatwiinda S, Harris JB, Phiri W, Krüüner A, Kaunda K, et al. Screening for  
29 344 tuberculosis and testing for human immunodeficiency virus in Zambian prisons. *Bulletin of the World*  
30 345 *Health Organization*. 2015;93:93-101.
- 31 346 7. Ubumi Prisons Initiative. Zambian Prisons [updated 4th August 2020; cited 2020 4th August  
32 347 2020]. Available from: [https://ubumi.net/zambian\\_prisons.html](https://ubumi.net/zambian_prisons.html).
- 33 348 8. Herce ME, Hoffmann CJ, Fielding K, Topp SM, Hausler H, Chimoyi L, et al. Universal test-and-  
34 349 treat in Zambian and South African correctional facilities: a multisite prospective cohort study. *The*  
35 350 *Lancet HIV*. 2020;7(12):e807-e16.
- 37 351 9. Topp SM, Sharma A, Moonga CN, Chileshe C, Magwende G, Henostroza G. Evaluation of a  
38 352 health system strengthening initiative in the Zambian prison system. *BMJ global health*. 2018;3(1).
- 39 353 10. Herce ME, Muyoyeta M, Topp SM, Henostroza G, Reid SE. Coordinating the prevention,  
40 354 treatment, and care continuum for HIV-associated tuberculosis in prisons: a health systems  
41 355 strengthening approach. *Current Opinion in HIV and AIDS*. 2018;13(6):492.
- 42 356 11. Institute of Crime and Justice Policy Research B. World Prison Brief 2020 [cited 2020 21st  
43 357 July 2020]. Available from: <https://www.prisonstudies.org/country/zambia>.
- 44 358 12. Government of the Republic of Zambia. The Juvenile Act. Chapter 53 of the Laws of  
45 359 Zambia 1964.
- 47 360 13. Government of the Republic of Zambia. The Prisons Act Lusaka, Zambia: Government  
48 361 Printer; 2004 [cited 2020 13th May 2020]. Available from:  
49 362 <https://www.parliament.gov.zm/node/840>.
- 50 363 14. Kapata N, Mbulo G, Cobelens F, de Haas P, Schaap A, Mwamba P, et al. The second Zambian  
51 364 national tuberculosis drug resistance survey—a comparison of conventional and molecular methods.  
52 365 *Tropical Medicine & International Health*. 2015;20(11):1492-500.
- 53 366 15. Kapata N, Chanda-Kapata P, Ngosa W, Metitiri M, Klinkenberg E, Kalisvaart N, et al. The  
54 367 prevalence of tuberculosis in Zambia: results from the first national TB prevalence survey, 2013–  
55 368 2014. *PLoS One*. 2016;11(1):e0146392.
- 57 369 16. Ministry of Health Zambia. Zambia Population-based HIV Impact assessment 2016. Lusaka;  
58 370 2019.
- 59 371 17. Donald PR, Marais BJ, Barry CE. Age and the epidemiology and pathogenesis of tuberculosis.  
60 372 *The Lancet*. 2010;375(9729):1852-4.

- 1  
2  
3 373 18. Stop TB partnership. Tuberculosis Situation in 2019, Zambia [cited 2021 19th February  
4 374 2021]. Available from: [http://stoptb.org/resources/cd/ZMB\\_Dashboard.html](http://stoptb.org/resources/cd/ZMB_Dashboard.html).
- 5 375 19. Todrys KW, Amon JJ. Human rights and health among juvenile prisoners in Zambia. *Int J*  
6 376 *Prison Health*. 2011;7(1):10-7.
- 7 377 20. World Health Organisation. Chest Radiography in Tuberculosis Case Detection.  
8 378 Switzerland 2016 [cited 2021 10th June 2021]. Available from:  
9 379 [https://apps.who.int/iris/bitstream/handle/10665/252424/9789241511506-](https://apps.who.int/iris/bitstream/handle/10665/252424/9789241511506-eng.pdf;jsessionid=72EC9D02021FEBF4C6CCA41896818F45?sequence=1)  
10 380 [eng.pdf;jsessionid=72EC9D02021FEBF4C6CCA41896818F45?sequence=1](https://apps.who.int/iris/bitstream/handle/10665/252424/9789241511506-eng.pdf;jsessionid=72EC9D02021FEBF4C6CCA41896818F45?sequence=1).
- 11 381 21. World Health Organisation. WHO operational handbook on TB diagnosis. Geneva 2020 [cited  
12 382 2021 10th June 2021]. Available from: [https://www.who.int/publications/i/item/who-operational-](https://www.who.int/publications/i/item/who-operational-handbook-on-tuberculosis-module-3-diagnosis---rapid-diagnostics-for-tuberculosis-detection)  
13 383 [handbook-on-tuberculosis-module-3-diagnosis---rapid-diagnostics-for-tuberculosis-detection](https://www.who.int/publications/i/item/who-operational-handbook-on-tuberculosis-module-3-diagnosis---rapid-diagnostics-for-tuberculosis-detection).
- 14 384 22. Mabud TS, de Lourdes Delgado Alves M, Ko AI, Basu S, Walter KS, Cohen T, et al. Evaluating  
15 385 strategies for control of tuberculosis in prisons and prevention of spillover into communities: An  
16 386 observational and modeling study from Brazil. *PLoS medicine*. 2019;16(1):e1002737.
- 17 387 23. Melese A, Demelash H. The prevalence of tuberculosis among prisoners in Ethiopia: a  
18 388 systematic review and meta-analysis of published studies. *Archives of Public Health*. 2017;75(1):1-9.
- 19 389 24. Banda H, Gausi F, Harries A, Salaniponi F. Prevalence of smear-positive pulmonary  
20 390 tuberculosis among prisoners in Malawi: a national survey. *The international journal of tuberculosis*  
21 391 *and lung disease*. 2009;13(12):1557-9.
- 22 392 25. Stevenson KA, Podewils LJ, Zishiri VK, Castro KG, Charalambous S. HIV prevalence and the  
23 393 cascade of care in five South African correctional facilities. *PLoS One*. 2020;15(7):e0235178.
- 24 394 26. Organization WH. WHO policy on TB infection control in health-care facilities, congregate  
25 395 settings and households. World Health Organization; 2009. Report No.: 9241598328.
- 26 396 27. World health Organisation. Global Tuberculosis Report 2019 2019 [Available from:  
27 397 <https://apps.who.int/iris/bitstream/handle/10665/329368/9789241565714-eng.pdf?ua=1>.
- 28 398 28. Gizachew Beza M, Hunegnaw E, Tiruneh M. Prevalence and associated factors of  
29 399 tuberculosis in prisons settings of East Gojjam Zone, Northwest Ethiopia. *International journal of*  
30 400 *bacteriology*. 2017;2017.
- 31 401 29. Séri B, Koffi A, Danel C, Ouassa T, Blehoué M-A, Ouattara E, et al. Prevalence of pulmonary  
32 402 tuberculosis among prison inmates: A cross-sectional survey at the Correctional and Detention  
33 403 Facility of Abidjan, Côte d'Ivoire. *PloS one*. 2017;12(7):e0181995.
- 34 404 30. Noeske J, Ndi N, Mbondi S. Controlling tuberculosis in prisons against confinement  
35 405 conditions: a lost case? Experience from Cameroon. *The International journal of tuberculosis and*  
36 406 *lung disease*. 2011;15(2):223-7.
- 37 407 31. United Nations Office on Drug and Crime U. Women and HIV in prison settings Austria 2008  
38 408 [cited 2021 1st February 2021]. Available from:  
39 409 [https://www.unodc.org/documents/middleeastandnorthafrica/drug-prevention-health-](https://www.unodc.org/documents/middleeastandnorthafrica/drug-prevention-health-publications/WOMEN_AND_HIV_IN_PRISON_SETTINGS.pdf)  
40 410 [publications/WOMEN AND HIV IN PRISON SETTINGS.pdf](https://www.unodc.org/documents/middleeastandnorthafrica/drug-prevention-health-publications/WOMEN_AND_HIV_IN_PRISON_SETTINGS.pdf).
- 41 411 32. Simooya OO, Sanjobo NE, Kaetano L, Sijumbila G, Munkonze FH, Tailoka F, et al. 'Behind  
42 412 walls': a study of HIV risk behaviours and seroprevalence in prisons in Zambia. *Aids*.  
43 413 2001;15(13):1741-4.
- 44 414 33. Zambia MoH. Zambia Consolidated Guidelines on Treatment and Prevention of HIV  
45 415 infection. Lusaka; 2016.
- 46 416 34. Yukhnenko D, Sridhar S, Fazel S. A systematic review of criminal recidivism rates worldwide:  
47 417 3-year update. *Wellcome open research*. 2019;4.
- 48 418 35. Henostroza G, Topp SM, Hatwiinda S, Maggard KR, Phiri W, Harris JB, et al. The high burden  
49 419 of tuberculosis (TB) and human immunodeficiency virus (HIV) in a large Zambian prison: a public  
50 420 health alert. *PloS one*. 2013;8(8):e67338.
- 51 421 36. Todrys KW, Amon JJ, Malembeka G, Clayton M. Imprisoned and imperiled: access to HIV and  
52 422 TB prevention and treatment, and denial of human rights, in Zambian prisons. *Journal of the*  
53 423 *International AIDS Society*. 2011;14(1):1-11.

1  
2  
3 424  
4  
56 425 **ACKNOWLEDGEMENT**  
7  
8  
9

10 426 The Zambia Correctional Service, Ministry of Community Development and Social Welfare and  
11  
12 427 the correctional health committees are acknowledged for the support provided to the EJJOH  
13  
14  
15 428 project team during data collection. Innocent Mwaba is acknowledged for drawing the map  
16  
17 429 showing study sites.  
18

19  
20 430  
21  
2223  
24 431 **FUNDING**  
25  
26  
27

28 432 This research was funded by the Elton John AIDS Foundation; under the Elton John Juveniles  
29  
30 433 Offenders' Health (EJJOH) project (no grant number received).  
31

32  
33 434  
34  
3536  
37 435 **AUTHOR CONTRIBUTIONS**  
38  
39  
40  
41

42 436 Conceived and designed the study: MK, SH, CNM, MM. Database design and data curation:  
43  
44 437 PS, JB. Implemented the study: MK, SH, MT, TZ, CNM, MM. Data analysis: PS, MK, FB. Wrote  
45  
46 438 the original draft: MK. Reviewed the manuscript: SH, MT, JB, PS, TZ, FB, CNM, MM. Approved  
47  
48  
49 439 the final version to be published: MK, SH, PS, MT, JB, TZ, FB, CNM, MM.

50  
51  
52 440 The corresponding author attests that all listed authors meet authorship criteria and that no  
53  
54 441 others meeting the criteria have been omitted.  
55  
56  
57  
58  
59  
60

1  
2  
3  
4 442  
5  
6  
7  
8

9 443 **CONFLICT OF INTEREST**

10  
11  
12  
13 444 The authors declare no conflict of interest.  
14  
15

16 445  
17  
18  
19

20 446 **DATA SHARING STATEMENT**

21  
22  
23  
24 447 Additional data is available upon request by emailing [Monde.Muyoyeta@cidrz.org](mailto:Monde.Muyoyeta@cidrz.org)  
25  
26  
27  
28  
29  
30  
31  
32  
33  
34  
35  
36  
37  
38  
39  
40  
41  
42  
43  
44  
45  
46  
47  
48  
49  
50  
51  
52  
53  
54  
55  
56  
57  
58  
59  
60



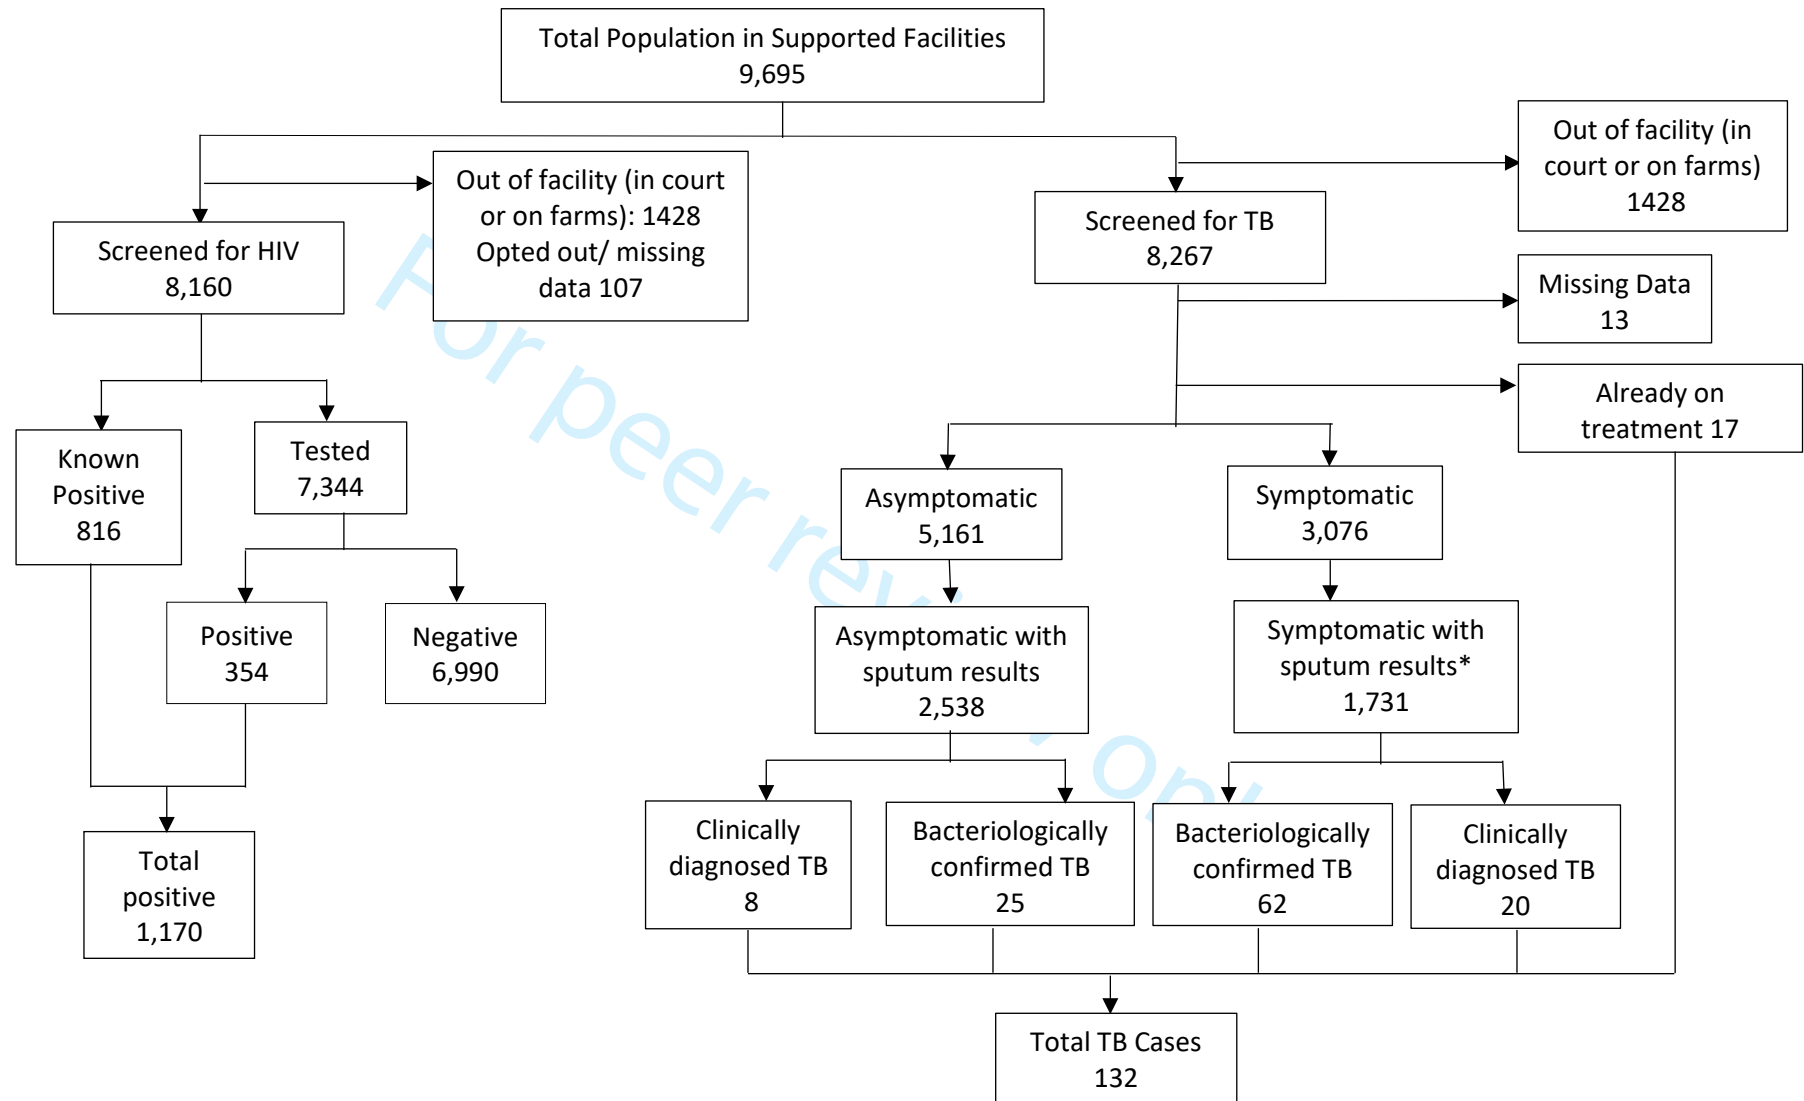

HIV- Human Immunodeficiency Virus, TB- Tuberculosis

\*All symptomatic patients submitted sputum, however, some correctional facilities only documented results of patients with positive results.

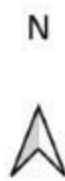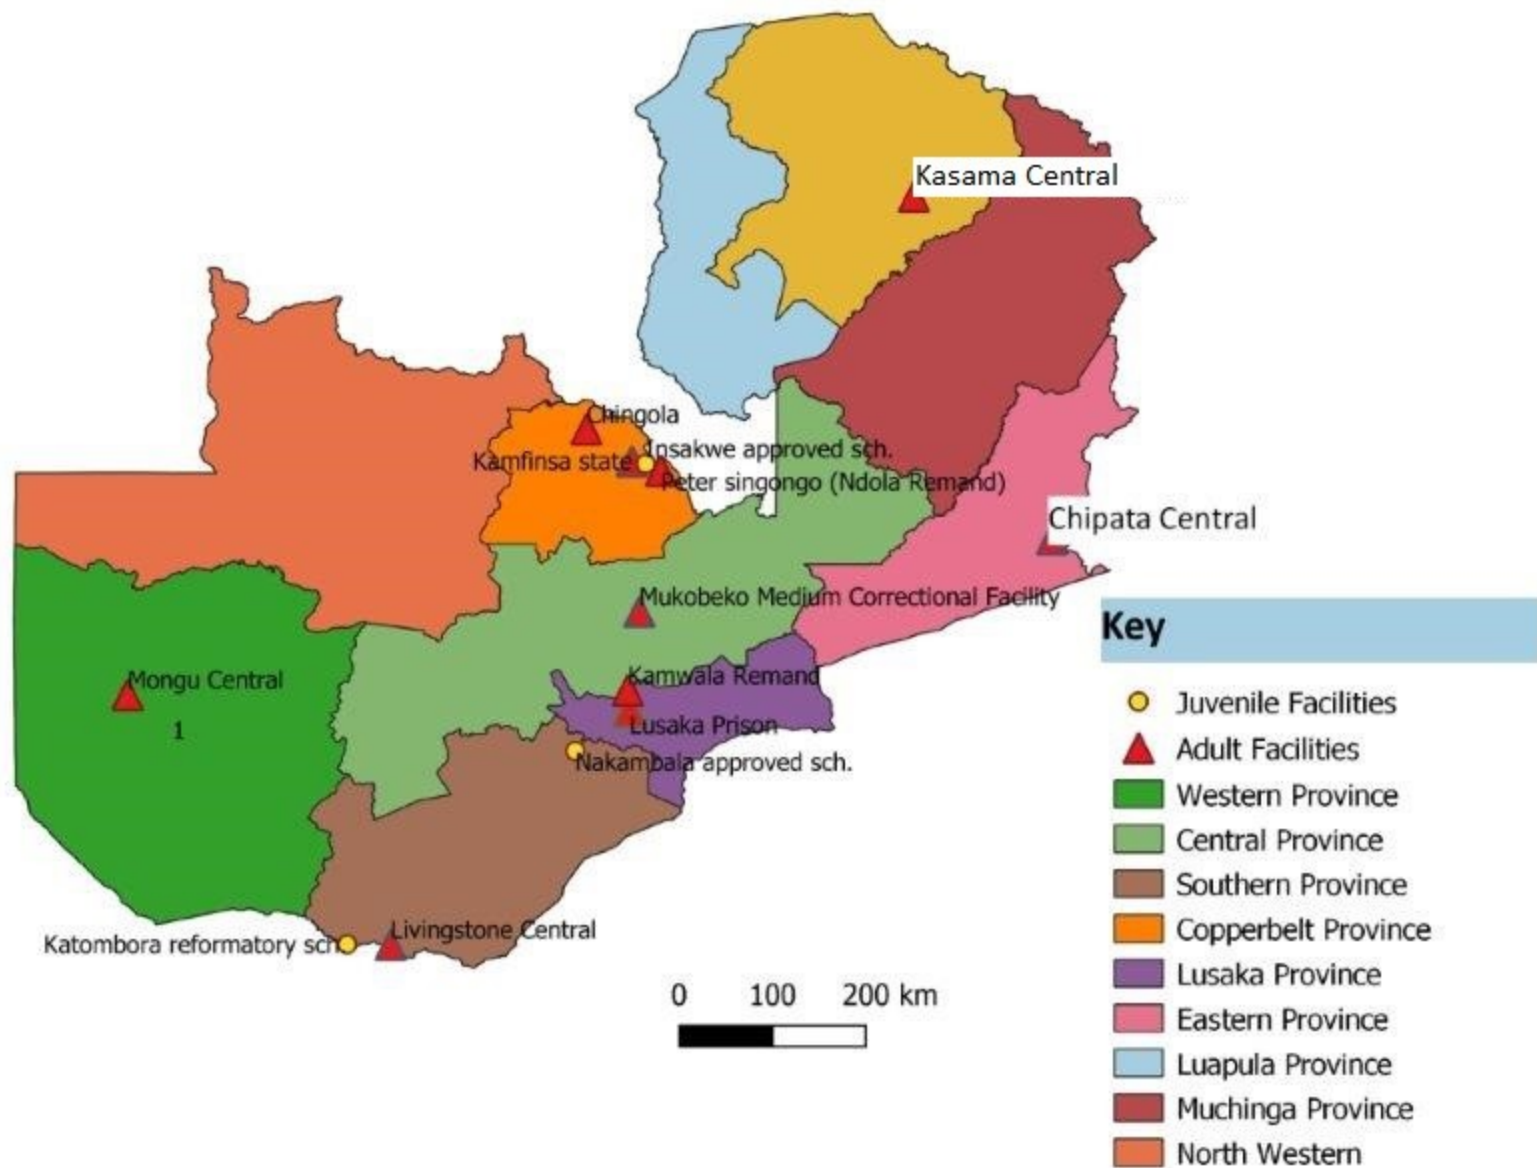

1  
2  
3  
4  
5  
6  
7  
8  
9  
10  
11  
12  
13  
14  
15  
16  
17  
18  
19  
20  
21  
22  
23  
24  
25  
26  
27  
28  
29  
30  
31  
32  
33  
34  
35  
36  
37  
38  
39  
40  
41  
42  
43  
44  
45  
46  
47

STROBE Statement—Checklist of items that should be included in reports of *cross-sectional studies*

|                              | Item No                                                                            | Recommendation                                                                                                                                                                                    | Page No |
|------------------------------|------------------------------------------------------------------------------------|---------------------------------------------------------------------------------------------------------------------------------------------------------------------------------------------------|---------|
| <b>Title and abstract</b>    | 1                                                                                  | (a) Indicate the study's design with a commonly used term in the title or the abstract                                                                                                            | 2       |
|                              |                                                                                    | (b) Provide in the abstract an informative and balanced summary of what was done and what was found                                                                                               | 2       |
| <b>Introduction</b>          |                                                                                    |                                                                                                                                                                                                   |         |
| Background/rationale         | 2                                                                                  | Explain the scientific background and rationale for the investigation being reported                                                                                                              | 4       |
| Objectives                   | 3                                                                                  | State specific objectives, including any prespecified hypotheses                                                                                                                                  | 4       |
| <b>Methods</b>               |                                                                                    |                                                                                                                                                                                                   |         |
| Study design                 | 4                                                                                  | Present key elements of study design early in the paper                                                                                                                                           | 5       |
| Setting                      | 5                                                                                  | Describe the setting, locations, and relevant dates, including periods of recruitment, exposure, follow-up, and data collection                                                                   | 5,6     |
| Participants                 | 6                                                                                  | (a) Give the eligibility criteria, and the sources and methods of selection of participants                                                                                                       | 6,7     |
| Variables                    | 7                                                                                  | Clearly define all outcomes, exposures, predictors, potential confounders, and effect modifiers. Give diagnostic criteria, if applicable                                                          | 7,8     |
| Data sources/<br>measurement | 8*                                                                                 | For each variable of interest, give sources of data and details of methods of assessment (measurement). Describe comparability of assessment methods if there is more than one group              | 6,7     |
| Bias                         | 9                                                                                  | Describe any efforts to address potential sources of bias                                                                                                                                         | 6       |
| Study size                   | 10                                                                                 | Explain how the study size was arrived at                                                                                                                                                         | 6       |
| Quantitative variables       | 11                                                                                 | Explain how quantitative variables were handled in the analyses. If applicable, describe which groupings were chosen and why                                                                      | 7,8     |
| Statistical methods          | 12                                                                                 | (a) Describe all statistical methods, including those used to control for confounding                                                                                                             | 7,8     |
|                              |                                                                                    | (b) Describe any methods used to examine subgroups and interactions                                                                                                                               | 7,8     |
|                              | (c) Explain how missing data were addressed                                        | 8                                                                                                                                                                                                 |         |
|                              | (d) If applicable, describe analytical methods taking account of sampling strategy |                                                                                                                                                                                                   |         |
|                              | (e) Describe any sensitivity analyses                                              |                                                                                                                                                                                                   |         |
| <b>Results</b>               |                                                                                    |                                                                                                                                                                                                   |         |
| Participants                 | 13*                                                                                | (a) Report numbers of individuals at each stage of study—eg numbers potentially eligible, examined for eligibility, confirmed eligible, included in the study, completing follow-up, and analysed | 8, 9    |
|                              |                                                                                    | (b) Give reasons for non-participation at each stage                                                                                                                                              | 8,9     |
|                              |                                                                                    | (c) Consider use of a flow diagram                                                                                                                                                                | 9       |
| Descriptive data             | 14*                                                                                | (a) Give characteristics of study participants (eg demographic, clinical, social) and information on exposures and potential confounders                                                          | 9,10    |
|                              |                                                                                    | (b) Indicate number of participants with missing data for each variable of interest                                                                                                               | 10-13   |
| Outcome data                 | 15*                                                                                | Report numbers of outcome events or summary measures                                                                                                                                              | 10-13   |

|    |                          |    |                                                                                                                                                                                                              |
|----|--------------------------|----|--------------------------------------------------------------------------------------------------------------------------------------------------------------------------------------------------------------|
| 1  |                          |    |                                                                                                                                                                                                              |
| 2  | Main results             | 16 | (a) Give unadjusted estimates and, if applicable, confounder-adjusted estimates and their precision (eg, 95% confidence interval). Make clear which confounders were adjusted for and why they were included |
| 3  |                          |    |                                                                                                                                                                                                              |
| 4  |                          |    |                                                                                                                                                                                                              |
| 5  |                          |    |                                                                                                                                                                                                              |
| 6  |                          |    | (b) Report category boundaries when continuous variables were categorized                                                                                                                                    |
| 7  |                          |    |                                                                                                                                                                                                              |
| 8  |                          |    | (c) If relevant, consider translating estimates of relative risk into absolute risk for a meaningful time period                                                                                             |
| 9  |                          |    |                                                                                                                                                                                                              |
| 10 |                          |    |                                                                                                                                                                                                              |
| 11 | Other analyses           | 17 | Report other analyses done—eg analyses of subgroups and interactions, and sensitivity analyses                                                                                                               |
| 12 |                          |    |                                                                                                                                                                                                              |
| 13 |                          |    |                                                                                                                                                                                                              |
| 14 | <b>Discussion</b>        |    |                                                                                                                                                                                                              |
| 15 | Key results              | 18 | Summarise key results with reference to study objectives                                                                                                                                                     |
| 16 | Limitations              | 19 | Discuss limitations of the study, taking into account sources of potential bias or imprecision. Discuss both direction and magnitude of any potential bias                                                   |
| 17 |                          |    |                                                                                                                                                                                                              |
| 18 |                          |    |                                                                                                                                                                                                              |
| 19 |                          |    |                                                                                                                                                                                                              |
| 20 | Interpretation           | 20 | Give a cautious overall interpretation of results considering objectives, limitations, multiplicity of analyses, results from similar studies, and other relevant evidence                                   |
| 21 |                          |    |                                                                                                                                                                                                              |
| 22 |                          |    |                                                                                                                                                                                                              |
| 23 |                          |    |                                                                                                                                                                                                              |
| 24 | Generalisability         | 21 | Discuss the generalisability (external validity) of the study results                                                                                                                                        |
| 25 |                          |    |                                                                                                                                                                                                              |
| 26 | <b>Other information</b> |    |                                                                                                                                                                                                              |
| 27 | Funding                  | 22 | Give the source of funding and the role of the funders for the present study and, if applicable, for the original study on which the present article is based                                                |
| 28 |                          |    |                                                                                                                                                                                                              |
| 29 |                          |    |                                                                                                                                                                                                              |
| 30 |                          |    |                                                                                                                                                                                                              |

\*Give information separately for exposed and unexposed groups.

**Note:** An Explanation and Elaboration article discusses each checklist item and gives methodological background and published examples of transparent reporting. The STROBE checklist is best used in conjunction with this article (freely available on the Web sites of PLoS Medicine at <http://www.plosmedicine.org/>, Annals of Internal Medicine at <http://www.annals.org/>, and Epidemiology at <http://www.epidem.com/>). Information on the STROBE Initiative is available at [www.strobe-statement.org](http://www.strobe-statement.org).

# BMJ Open

## A cross sectional assessment of Tuberculosis and Human Immunodeficiency Virus prevalence in 13 correctional facilities in Zambia

|                                 |                                                                                                                                                                                                                                                                                                                                                                                                                                                                                                                                                                                                                                                                                                                                                                                                     |
|---------------------------------|-----------------------------------------------------------------------------------------------------------------------------------------------------------------------------------------------------------------------------------------------------------------------------------------------------------------------------------------------------------------------------------------------------------------------------------------------------------------------------------------------------------------------------------------------------------------------------------------------------------------------------------------------------------------------------------------------------------------------------------------------------------------------------------------------------|
| Journal:                        | <i>BMJ Open</i>                                                                                                                                                                                                                                                                                                                                                                                                                                                                                                                                                                                                                                                                                                                                                                                     |
| Manuscript ID                   | bmjopen-2021-052221.R2                                                                                                                                                                                                                                                                                                                                                                                                                                                                                                                                                                                                                                                                                                                                                                              |
| Article Type:                   | Original research                                                                                                                                                                                                                                                                                                                                                                                                                                                                                                                                                                                                                                                                                                                                                                                   |
| Date Submitted by the Author:   | 15-Aug-2021                                                                                                                                                                                                                                                                                                                                                                                                                                                                                                                                                                                                                                                                                                                                                                                         |
| Complete List of Authors:       | Kagujje, Mary; Center for Infectious Disease Research in Zambia, Tuberculosis department<br>Somwe, Paul; Center for Infectious Disease Research in Zambia, Strategic Information department<br>Hatwiinda, Sisa; Center for Infectious Disease Research in Zambia, Tuberculosis department<br>Bwalya, Joel; Center for Infectious Disease Research in Zambia, Strategic Information department<br>Zgambo, Tamala; Zambia Correctional Service<br>Thornicroft, Moomba; Center for Infectious Disease Research in Zambia, Tuberculosis department<br>Bozzani, Fiammetta; London School of Hygiene and Tropical Medicine Faculty of Public Health and Policy<br>Moonga, Clement; Center for Infectious Disease Research in Zambia<br>Muyoyeta, Monde ; Center for Infectious Disease Research in Zambia |
| <b>Primary Subject Heading</b>: | Epidemiology                                                                                                                                                                                                                                                                                                                                                                                                                                                                                                                                                                                                                                                                                                                                                                                        |
| Secondary Subject Heading:      | Infectious diseases, Public health                                                                                                                                                                                                                                                                                                                                                                                                                                                                                                                                                                                                                                                                                                                                                                  |
| Keywords:                       | Tuberculosis < INFECTIOUS DISEASES, HIV & AIDS < INFECTIOUS DISEASES, EPIDEMIOLOGY, PUBLIC HEALTH                                                                                                                                                                                                                                                                                                                                                                                                                                                                                                                                                                                                                                                                                                   |
|                                 |                                                                                                                                                                                                                                                                                                                                                                                                                                                                                                                                                                                                                                                                                                                                                                                                     |

SCHOLARONE™  
Manuscripts



I, the Submitting Author has the right to grant and does grant on behalf of all authors of the Work (as defined in the below author licence), an exclusive licence and/or a non-exclusive licence for contributions from authors who are: i) UK Crown employees; ii) where BMJ has agreed a CC-BY licence shall apply, and/or iii) in accordance with the terms applicable for US Federal Government officers or employees acting as part of their official duties; on a worldwide, perpetual, irrevocable, royalty-free basis to BMJ Publishing Group Ltd ("BMJ") its licensees and where the relevant Journal is co-owned by BMJ to the co-owners of the Journal, to publish the Work in this journal and any other BMJ products and to exploit all rights, as set out in our [licence](#).

The Submitting Author accepts and understands that any supply made under these terms is made by BMJ to the Submitting Author unless you are acting as an employee on behalf of your employer or a postgraduate student of an affiliated institution which is paying any applicable article publishing charge ("APC") for Open Access articles. Where the Submitting Author wishes to make the Work available on an Open Access basis (and intends to pay the relevant APC), the terms of reuse of such Open Access shall be governed by a Creative Commons licence – details of these licences and which [Creative Commons](#) licence will apply to this Work are set out in our licence referred to above.

Other than as permitted in any relevant BMJ Author's Self Archiving Policies, I confirm this Work has not been accepted for publication elsewhere, is not being considered for publication elsewhere and does not duplicate material already published. I confirm all authors consent to publication of this Work and authorise the granting of this licence.

# A cross sectional assessment of Tuberculosis and Human Immunodeficiency Virus prevalence in 13 correctional facilities in Zambia

Mary Kagujje ([0000-0003-4818-6548](tel:0000-0003-4818-6548))<sup>1</sup>, Paul Somwe<sup>2</sup>, Sisa Hatwiinda<sup>1</sup>, Joel Bwalya<sup>2</sup>, Tamala Zgambo<sup>3</sup>, Moomba Thornicroft<sup>1</sup>, Fiammetta Bozzani<sup>4</sup>, Clement Nchimunya Moonga<sup>1</sup>, Monde Muyoyeta<sup>1</sup>

## Author affiliations

1. Tuberculosis department, Centre for Infectious Disease Research in Zambia, P.O. Box 34681 Lusaka, Zambia 10101
2. Strategic Information department, Centre for Infectious Disease Research in Zambia, P.O. Box 34681 Lusaka, Zambia 10101
3. Zambia Correctional Service, P.O. Box 80926 Kabwe, Zambia 10101
4. London School of Hygiene and Tropical Medicine, Keppel Street London WC1E 7HT, United Kingdom

Correspondence to Mary Kagujje; [mkagujje@gmail.com](mailto:mkagujje@gmail.com)

**Key words:** Correctional facilities, Tuberculosis, HIV, incarcerated population, Zambia

## 22 ABSTRACT

23 **Objective:** To determine the prevalence of Tuberculosis (TB) and Human Immunodeficiency  
24 virus (HIV) in 13 Zambian correctional facilities.

25 **Methods:** Cross sectional study

26 **Setting:** 13 correctional facilities in 7 of the 10 provinces in Zambia.

27 **Participants:** All incarcerated individuals were eligible for TB and HIV screening and testing.  
28 Of the total study population of 9,695 individuals, which represent 46.2% of total correctional  
29 population at the beginning of the study, 8,267 and 8,160 were screened for TB and HIV  
30 respectively.

31 **Interventions:** TB and HIV screening and testing was done between July 2018 and February  
32 2019.

33 **Primary outcome measures:** All forms of TB, bacteriologically confirmed TB, drug resistant  
34 TB, HIV

35 **Results:** Prevalence of all forms of TB and bacteriologically confirmed TB was 1598(1340-  
36 1894) per 100,000 population and 1056(847-1301) per 100,000 population, respectively.  
37 Among those with bacteriologically confirmed TB, 4.6% (1.3%-11.4%) had drug resistant TB.  
38 There was no statistically significant difference in the prevalence of different forms of TB  
39 between adults and juveniles: (p= 0.82), (p= 0.23), (p=0.68). Of the bacteriologically  
40 confirmed TB cases, 28.7% were asymptomatic. The prevalence of HIV was 14.3% (13.6%-  
41 15.1%). The prevalence of HIV among females was 1.8 times the prevalence of HIV among  
42 males (p=0.01).

43 **Conclusion:** Compared to the study in 2011 which screened inmates representing 30% of the  
44 country's inmate population then, the prevalence of all forms of TB and HIV in correctional



1  
2  
3 45 facilities has reduced by about 75% and 37.6% respectively. However, compared to the  
4  
5  
6 46 general population, the prevalence of all forms of TB and HIV was 3.5 and 1.3 times higher,  
7  
8 47 respectively. TB/HIV programs in correctional facilities need further strengthening to include  
9  
10 48 aspects of juvenile specific TB programming and gender responsive HIV programming.  
11  
12  
13  
14  
15  
16  
17  
18  
19  
20  
21  
22  
23  
24  
25  
26  
27  
28  
29  
30  
31  
32  
33  
34  
35  
36  
37  
38  
39  
40  
41  
42  
43  
44  
45  
46  
47  
48  
49  
50  
51  
52  
53  
54  
55  
56  
57  
58  
59  
60

For peer review only

## ARTICLE SUMMARY

### Strengths and limitations of this study

- This is the only study on prevalence of TB and HIV in Zambian correctional facilities in the past 8 years.
- Results are generalisable to the 13 correctional facilities as a large sample was screened for TB and HIV.
- Data disaggregates can inform targeted interventions to reduce the burden of both diseases.
- Variations in TB screening algorithms could have underestimated TB prevalence.
- Asymptomatic TB was not consistently screened for.

## 60 INTRODUCTION

61 Globally, correctional facilities are disproportionately affected by tuberculosis (TB) and the  
62 Human Immunodeficiency Virus (HIV). (1-3) In some correctional facilities: the prevalence of  
63 TB has been reported to be up to 100 times higher than the prevalence in the general  
64 population (1) while the prevalence of HIV has been reported to be up to 23 times higher  
65 than the prevalence in the general population(3). The poor living conditions in correctional  
66 facilities perpetuate TB and HIV. While overcrowding, poor ventilation, HIV, poor nutrition  
67 and late case detection perpetuate TB; sexual violence, sharing of sharp objects and lack of  
68 access to condoms perpetuate HIV. (4, 5) Additionally, incarcerated people often come from  
69 socio-economically disadvantaged backgrounds where the burden of TB and HIV is already  
70 high. (1, 3)

71  
72 In 2011, the prevalence of all forms of TB in 6 Zambian correctional facilities representing 30%  
73 of the total incarcerated population was 6,428 per 100,000 population, which was 18 times  
74 higher than the national estimates. (6) In the same study, 0.6% of those with bacteriologically  
75 confirmed TB had rifampicin-resistant TB and the overall prevalence of HIV was 22.9%, which  
76 was 1.5 times the national prevalence.

77  
78 Since the last documented prevalence survey, several interventions including test and treat  
79 for HIV, health systems strengthening, nutritional support, TB and HIV entry screening, among  
80 others, have been put in place to control the burden of TB and its associated risk factors in  
81 Zambia correctional facilities. (7-10)

82

1  
2  
3 83 This study aimed to determine current prevalence of all forms of TB, bacteriologically  
4  
5 84 confirmed TB, and drug resistant (DR) TB and the prevalence of HIV in 13 Zambian correctional  
6  
7  
8 85 facilities.  
9

## 10 11 12 86 **METHODS** 13 14

### 15 16 17 87 **Study design** 18 19

20  
21 88 We present an analysis of cross-sectional data collected under programmatic conditions by  
22  
23 89 the Elton John Juvenile Offenders' health (EJJOH) project. The EJJOH project was a health  
24  
25 90 system strengthening project aimed at supporting provision of holistic and integrated health  
26  
27 91 services to juvenile offenders. While the project primarily targeted juveniles, its support was  
28  
29 92 extended to adults being held in the same facility with the juveniles so as to improve  
30  
31 93 infectious disease control. The project screened the incarcerated population as part of its  
32  
33 94 baseline assessment.  
34  
35  
36  
37  
38

### 39 95 **Study setting and population** 40 41

42  
43 96 Zambia has 87 correctional facilities with a total capacity of 9,150 incarcerated individuals.  
44  
45 97 (11) However, the total incarcerated population in Zambia was slightly over 21,000 in 2018  
46  
47 98 and 22,823 in 2019. In 2019, almost one in five individuals detained was in pre-trial detention.  
48  
49 99 (11) The data was collected between July 2018 and February 2019 in 13 correctional facilities  
50  
51 100 with a combined population of 9,695, representing 46.2% of the total correctional facility  
52  
53 101 population in Zambia in 2018. The 13 correctional facilities had been purposefully selected by  
54  
55 102 the EJJOH project because they held a significant number of juveniles. The facilities include  
56  
57  
58  
59  
60

1  
2  
3 103 Lusaka Central, Kamwala Remand, Livingstone Central, Katombora Reformatory School,  
4  
5  
6 104 Nakambala Approved school, Mukobeko Medium, Ndola remand, Kamfinsa State, Chingola,  
7  
8 105 Insakwe Approved School, Chipata Central, Mongu Central and Kasama Central (locations  
9  
10  
11 106 shown in Supplementary Figure 1). The Reformatory and approved schools hold ordered  
12  
13 107 (convicted) juveniles (persons less than 19 years old)(12); the other facilities are intended only  
14  
15 108 for adults and circumstantial children(13) but also hold juveniles who are still undergoing  
16  
17  
18 109 trial.

19  
20 110  
21  
22  
23 111 Across Zambia, routinely, incarcerated people should undergo universal TB screening and HIV  
24  
25 112 testing at entry or within 7 days of admission into correctional facilities. However, in some  
26  
27 113 facilities entry screening is not done due to various constraints. Depending on availability of  
28  
29 114 logistics, periodic TB and HIV mass screening are carried out, with freedom to opt out of HIV  
30  
31 115 testing but not TB screening and testing. TB screening is mandatory to increase early TB  
32  
33 116 detection and treatment so as to protect other inmates from TB.

34  
35  
36  
37 117

## 38 39 40 41 118 **Study Procedures**

42  
43  
44  
45 119 A project specific register was used; it was a modification of the National Presumptive TB  
46  
47 120 register with additional data elements on entry point, category of individual and previous  
48  
49 121 history of TB. All inmates were screened for TB; those who did not opt out were tested for  
50  
51 122 HIV. The screening point was documented under one of the following categories: mass  
52  
53 123 screening, entry screening from the community or entry screening transfer from other  
54  
55 124 correctional facility. The categories of individuals included adults and juveniles. Those already  
56  
57 125 on anti-TB treatment at the time of screening were documented as TB cases and those on  
58  
59  
60

1  
2  
3 126 anti-retroviral therapy (ART) were recorded as HIV positive and were not retested. Those with  
4  
5  
6 127 cough, fever, weight loss, night sweats, chest pain and shortness of breath, irrespective of  
7  
8 128 duration, were considered presumptive TB patients and submitted sputum for testing using  
9  
10 129 GeneXpert (Xpert MTB/Rif Assay. Cepheid, Sunnyvale, California, USA). Symptomatic  
11  
12  
13 130 individuals with a negative GeneXpert were referred for Chest x-ray (CXR) depending on the  
14  
15 131 clinician's discretion. There were 3 variations to this algorithm: 1) In Lusaka central, a random  
16  
17 132 proportion of the incarcerated population received CXR in addition to symptoms screening  
18  
19  
20 133 and those with either abnormal CXR or symptoms submitted sputum for GeneXpert; 2) at  
21  
22  
23 134 Ndola remand, all except those already on TB treatment submitted sputum irrespective of  
24  
25 135 symptoms; and 3) in Kabwe medium, Fluorescent Microscopy (FM) was used for sputum  
26  
27 136 examination instead of GeneXpert.  
28  
29  
30 137  
31  
32 138 Alere Determine™ HIV-1/2 test (AlereHIV-1/2; Abbott, Chicago, IL, USA) was used for HIV  
33  
34  
35 139 screening and SD-Bioline HIV-1/2 (SD-Bioline HIV-1/2; Abbott, Chicago, IL, USA) for  
36  
37 140 confirmation of positive screening test, following the standard Zambian HIV testing algorithm.  
38  
39  
40 141 All individuals received pre- and post-test HIV counselling. HIV positive inmates were  
41  
42 142 commenced on ART within 1-2 days.  
43  
44  
45

### 143 **Data analysis**

46  
47  
48  
49  
50 144 STATA Statistical Software (Stata Corporation Version 14. College Station, Texas 77845, USA)  
51  
52 145 was used for data analysis. A descriptive analysis was done to determine the characteristics  
53  
54 146 of the population screened and the prevalence of TB and HIV; overall prevalence and  
55  
56  
57 147 prevalence among subgroups was determined. The prevalence of all forms of TB included  
58  
59 148 bacteriologically confirmed TB and clinically diagnosed TB. Bacteriologically confirmed TB  
60

1  
2  
3 149 prevalence included those who had a positive GeneXpert or FM result, while patients already  
4  
5  
6 150 on TB treatment at time of screening were excluded from this analysis since data on the type  
7  
8 151 of TB had not been collected. DR TB prevalence included incarcerated people with rifampicin  
9  
10 152 resistance on GeneXpert. Missing data was excluded from the analysis.  
11  
12  
13  
14 153 Additionally, a chi-square test was done to determine if there was a statistically significant  
15  
16 154 difference in prevalence of TB and HIV between residents and new entrants into correctional  
17  
18 155 facilities. New entrants were defined as incarcerated people whose entry point was entry  
19  
20 156 screening from community while residents were defined as those whose entry point was  
21  
22 157 either mass screening or entry screening transfer from other correctional facility.  
23  
24  
25  
26

## 27 158 **Patient and Public involvement**

28  
29  
30  
31 159 The development of the research questions was intended to inform priority setting by the  
32  
33 160 EJJOH project based on the disease burden in correctional facilities. The incarcerated  
34  
35 161 population were not involved in the design of the project. The correctional health committees  
36  
37 162 constituting of the incarcerated persons, correctional officers and health care workers were  
38  
39 163 involved in the data collection. A representative of the correctional health committee at each  
40  
41 164 correctional facility participated in the dissemination meeting on project findings.  
42  
43  
44  
45  
46  
47  
48  
49

## 50 166 **RESULTS**

### 51 52 53 54 55 167 **Flow diagram and participant characteristics** 56 57 58 59 60

1  
2  
3 168 Of the total adult and juvenile population of 9,695 in the 13 correctional facilities, 8160  
4  
5 169 (84.2%) were screened for HIV and 8,267(85.3%) were screened for TB (Figure 1). Individuals  
6  
7  
8 170 not screened were 1,428 (14.7%) and they constituted those either in court or the farms. Of  
9  
10 171 those screened for HIV, 1170(14.3%) were HIV positive, of which 816 were known positive  
11  
12  
13 172 and 354 were new positives, while 6,990 (85.7%) were HIV negative. Of those screened for  
14  
15 173 TB, 17(0.2%) were already on treatment, 3,076 (37.3%) individuals had symptoms of TB, 5,161  
16  
17 174 (62.5%) were asymptomatic while 13 (0.2%) had missing data. A total of 4,269 individuals had  
18  
19 175 documented sputum results. Eighty seven (87) bacteriologically confirmed TB cases were  
20  
21 176 reported including 25(28.7%) asymptomatic individuals 62(71.3%) symptomatic individuals. A  
22  
23 177 total of 132 TB cases were identified including 87 (65.9%) bacteriologically confirmed TB  
24  
25 178 cases, 28 (21.2%) clinically diagnosed TB cases and the 17 (12.9%) that were already on TB  
26  
27 179 treatment at the time of screening.

32 180 Figure 1: Flow diagram of TB screening and diagnosis

35 181  
36 182 Of those screened, 7,805 (94.41%) were adults and 462 (5.58%) were juveniles (Table 1). The  
37  
38 183 overall median age (interquartile range (IQR)) of the participants was 32 years (IQR 10-93);  
39  
40 184 the median ages for the adults and juveniles were 33(IQR 19-93) and 17(IQR 10-18)  
41  
42 185 respectively. The males were 8,167 (98.79%), participants with a history of previous TB were  
43  
44 186 467 (5.65%), resident inmates were 7,767 (93.95%) while new entrants were 497 (6.01%).

50 187 Table 1: Characteristics of population screened

| Variable               | Participants (n= 8267) |
|------------------------|------------------------|
| Category of individual | n (%)                  |
| Adults                 | 7,805 (94.41%)         |
| Juveniles              | 462 (5.58%)            |



|                                             |                |
|---------------------------------------------|----------------|
| Median Age (IQR)                            |                |
| Overall                                     | 32(10-93)      |
| Adults ( $\geq 19$ years)                   | 33 (19-93)     |
| Juveniles (<19 years)                       | 17 (10-18)     |
| Sex                                         | n (%)          |
| Male                                        | 8,167 (98.79%) |
| Female                                      | 89 (1.08%)     |
| Missing                                     | 11 (0.13%)     |
| History of previous TB                      | n (%)          |
| Yes                                         | 467 (5.65%)    |
| No                                          | 7,786 (94.18%) |
| Missing                                     | 14 (0.17%)     |
| Type of screening visit                     | n (%)          |
| Mass screening                              | 7,602 (91.92%) |
| Entry screening other correctional facility | 165 (2.00%)    |
| Entry screening community                   | 497 (6.01%)    |
| Missing                                     | 3 (0.04%)      |

Abbreviations: IQR- Interquartile range, TB- Tuberculosis

## Prevalence of all forms of TB and bacteriologically confirmed TB

The overall prevalence of all forms of TB was 1,598 (1339-1892) per 100,000 population while the overall prevalence of bacteriologically confirmed TB was 1,056 (844-1301) per 100,000 population (Table 2). There was no statistically significant difference in the prevalence of both all forms of TB and bacteriologically confirmed TB between males and females, ( $p=0.51$ ) and ( $p=1.00$ ) respectively. It was the same for adults and juveniles ( $p= 0.82$ ) and ( $p= 0.23$ ) respectively and the new entrants and residents ( $p=0.25$ ) and ( $p=0.21$ ) respectively.

Table 2: Prevalence of all forms of TB and bacteriologically confirmed TB

|  | Cases/<br>Participants<br>(n/N) | Prevalence<br>of all forms<br>of TB per<br>100,000 (CI) | p-<br>value | Cases/<br>Participants<br>(n/N) | Prevalence of<br>Bacteriologically<br>confirmed TB<br>per 100,000 (CI) | p-<br>value |
|--|---------------------------------|---------------------------------------------------------|-------------|---------------------------------|------------------------------------------------------------------------|-------------|
|--|---------------------------------|---------------------------------------------------------|-------------|---------------------------------|------------------------------------------------------------------------|-------------|

|                            |                        |                      |      |                         |                    |      |
|----------------------------|------------------------|----------------------|------|-------------------------|--------------------|------|
| Overall                    | 132/8,254 <sup>1</sup> | 1599<br>(1340-1894)  |      | 87/8,237 <sup>1,2</sup> | 1056<br>(847-1301) |      |
| Sex                        |                        |                      |      |                         |                    |      |
| Male                       | 129/8,154              | 1582<br>(1322-1877)  | 0.60 | 84/8,137                | 1032<br>(824-1276) | 0.79 |
| Female                     | 1/89                   | 1124<br>(28- 6102)   |      | 1/89                    | 1124<br>(28- 6102) |      |
| Missing gender             | 2/11                   |                      |      | 2/11                    |                    |      |
| Category of individual     |                        |                      |      |                         |                    |      |
| Adult (≥19 years)          | 124/7,792              | 1591<br>(1325- 1894) | 0.82 | 79/7,775                | 1016<br>(805-1265) | 0.23 |
| Juvenile (<19 years)       | 8/462                  | 1732<br>(750-3383)   |      | 8/462                   | 1732<br>(750-3383) |      |
| Entry point <sup>1,3</sup> |                        |                      |      |                         |                    |      |
| Residents                  | 121/ 7757              | 1560<br>(1296- 1861) | 0.25 | 79/7740                 | 1020<br>(809-1270) | 0.21 |
| New entrants               | 11/494                 | 2227<br>(1117-3949)  |      | 8/494                   | 1619<br>(702-3166) |      |

198 Abbreviations: CI- Confidence interval, TB- Tuberculosis

199 Residents include those screened through mass screening and those under entry screening as a transfer from  
200 other correctional facility.

201 New entrants include those screened under entry screening from the community (police cells).

202 <sup>1</sup> Thirteen (13) participants had missing values on TB.

203 <sup>2</sup> Seventeen participants were already on TB treatment, bacteriological status unknown

204 <sup>3</sup>Three (3) participants had missing values on entry point

## 205 Prevalence of DR TB

206 Among the bacteriologically confirmed TB cases, the overall prevalence of DR TB was 4.6%  
207 (1.3%-11.4%) (Table 3). There was no statistically significant difference in prevalence of DR TB  
208 between males and females (p=0.95), between adults and juveniles (p=0.68), between those  
209 with and those without previous history of TB (p=0.72) and between the new entrants and  
210 residents(p=0.26).

211 Table 3: Prevalence of drug resistant TB

|                        | Cases/<br>Participants<br>(n/N) | Prevalence of DR TB<br>% (CI) | p-value |
|------------------------|---------------------------------|-------------------------------|---------|
| Overall                | 4/87                            | 4.6 (1.3-11.4)                |         |
| Sex                    |                                 |                               |         |
| Male                   | 4/84                            | 4.8 (1.3-11.7)                | 0.95    |
| Female                 | 0/1                             | 0 (0- 97.5) *                 |         |
| Missing                | 0/2                             |                               |         |
| Category of individual |                                 |                               |         |
| Adults (≥19 years)     | 4/79                            | 5.1 (1.4- 12.5)               | 0.68    |
| Juveniles (<19 years)  | 0/8                             | 0 (0-3.7) *                   |         |
| Previous History of TB |                                 |                               |         |
| No                     | 3/64                            | 4.7 (1.0-13.1)                | 0.72    |
| Yes                    | 1/23                            | 4.3 (0.1- 21.9)               |         |
| Entry point            |                                 |                               |         |
| Residents              | 3/76                            | 3.8 (0.8-10.7)                | 0.26    |
| New entrants           | 1/8                             | 12.5 (0.3-52.7)               |         |

Abbreviations: DR TB- Drug Resistant Tuberculosis CI- Confidence interval

Residents include those screened through mass screening and those under entry screening as a transfer from other correctional facility.

New incarcerated individuals include those screened under entry screening from the community (police cells).

\* one-sided, 97.5% confidence interval

## Prevalence of HIV

The overall HIV prevalence was 14.3% (13.6%-15.1%) (Table 4). The prevalence of HIV among males was 14.1% (13.4%-14.9%) and among females 25.8% (16.6%-35.1%) ( $p=0.01$ ). The prevalence of HIV among adults and juveniles was 15.0% (14.1%-15.7%) and 3.9% (2.3%-6.2%) ( $p<0.01$ ) respectively. There was no statistically significant differences in prevalence of HIV between residents and new entrants ( $p=0.05$ ).

Table 4: Prevalence of HIV

|  | Cases/<br>Participants<br>(n/N) | Prevalence of HIV<br>% (CI) | p-value |
|--|---------------------------------|-----------------------------|---------|
|--|---------------------------------|-----------------------------|---------|

|                            |                          |                  |      |
|----------------------------|--------------------------|------------------|------|
| Overall                    | 1,170/8,160 <sup>f</sup> | 14.3 (13.6-15.1) |      |
| Sex                        |                          |                  |      |
| Male                       | 1,139/8,061              | 14.1 (13.4-14.9) | 0.00 |
| Female                     | 23/89                    | 25.8 (17.4-36.2) |      |
| Missing sex                | 8/10                     |                  |      |
| Category of individual     |                          |                  |      |
| Adults (≥19 years)         | 1,153/7,727              | 15.0 (14.1-15.7) | 0.00 |
| Juveniles (<19 years)      | 17/433                   | 3.9 (2.3- 6.2)   |      |
| Entry point <sup>1,2</sup> |                          |                  |      |
| Residents                  | 1,118/7699               | 14.5(13.7-15.3)  | 0.06 |
| New entrants               | 52/460                   | 11.3 (8.6-14.6)  |      |

225 Abbreviations: CI- Confidence interval, HIV- Human Immunodeficiency virus

226 Residents include those screened through mass screening and those under entry screening as a transfer from  
 227 other correctional facility. New incarcerated individuals include those screened under entry screening from the  
 228 community (police cells).

229 <sup>1</sup>One hundred and seven (107) participants either opted out of HIV testing or had missing data

230 <sup>2</sup>Three (3) participants had missing entry point, 2 of which also had missing HIV status

231 (\*) one-sided, 97.5% confidence interval.

232 \*\* not determined.

233

## 234 DISCUSSION

### 235 Statement of principal findings

236 This study found that in Zambian correctional facilities, the prevalence of all forms of TB,  
 237 bacteriologically confirmed TB and DR TB were 3.5 times higher(14), 1.7 times higher(14) and  
 238 3.5 times higher(15) than the respective prevalence in the general population. Additionally,  
 239 the overall prevalence of HIV was 1.3 times higher than the prevalence in the general  
 240 population (16) and the prevalence of HIV among females was 1.8 times higher than the  
 241 prevalence of HIV among males within correctional facilities. Of the bacteriologically  
 242 confirmed TB cases, 28.7% were asymptomatic.

### 243 **Study findings in relation to other studies**

244 It is noteworthy that there is no statistically significant difference in prevalence of all forms  
245 TB and bacteriologically confirmed TB between juveniles and adults and that in fact the point  
246 estimates for TB in juveniles were higher; generally older adults have a higher TB burden than  
247 adolescents. (17, 18) This suggests that the disproportionate access to TB services and health  
248 services in general among juveniles in Zambian correctional facilities reported between 2009-  
249 2010 has persisted. (19) Another significant contrast relative to the general population is the  
250 absence of a statistically significant difference in prevalence of bacteriologically confirmed TB  
251 between males and females. (14) This could be due to absence of gender related differences  
252 in exposure to risk factors for TB infection and disease but could also be due to the small  
253 sample size and very wide confidence intervals among females.

254  
255 In comparison to the 2010-2011 study, the prevalence of all forms of TB has reduced by about  
256 75% while the prevalence of bacteriologically confirmed TB has reduced by 50%. (6) The  
257 reduction in prevalence of all forms of TB and bacteriologically confirmed TB could be a result  
258 of the TB interventions being implemented within the Zambian correctional facilities since  
259 2011. This explanation is supported by findings from an observational and modelling study  
260 done in Brazil: entry screening, active screening for TB among inmates, TB preventive therapy  
261 and annual mass screening independently reduce the incidence of TB in correctional facilities  
262 by 10.3%, 35%, 23.5% and 47.5% respectively after a period of 10 years and a combination of  
263 these interventions reduces the TB incidence by 79.2% after a period of 10 years. (20)  
264 However, it is worth mentioning that though the previous study used a more sensitive  
265 algorithm involving x-ray and culture(21, 22) for all inmates, the reduction is so large that it  
266 cannot simply be explained by use of different algorithms. Other countries in sub-Saharan

1  
2  
3 267 Africa with results involving multiple correctional facilities report TB prevalence ranging from  
4  
5 268 457 - 888 per 100,000 population. (23-25) However, a direct comparison to the prevalence  
6  
7  
8 269 reported in the other countries can't be done due to differences in definitions of TB used and  
9  
10 270 differences in prevalence in the general population.  
11  
12

13 271

15 272 The prevalence of DR TB among people with no history of TB is similar to the prevalence  
16  
17 273 among people with previous history of TB, suggesting significant transmission of DR TB either  
18  
19  
20 274 in correctional facilities or in the communities where the incarcerated people come from, or  
21  
22  
23 275 both. Strengthening TB infection control can reduce transmission of DR TB. (26) In comparison  
24  
25 276 to the 2010-2011 study, the prevalence of DR TB has increased by 667%. (6) The increasing  
26  
27  
28 277 trend of DR TB in the Zambian correctional facility setting is also seen at the global and  
29  
30 278 national levels.(27) The prevalence of DR TB in this study can't be directly compared to other  
31  
32 279 correctional facility settings since the forms of drug resistance reported are different. (28-30)  
33  
34

35 280

37 281 Similar to the national picture, the prevalence of HIV was higher among adults than juveniles  
38  
39  
40 282 and was higher among females than males. (16) However, the prevalence of HIV in women  
41  
42 283 relative to the prevalence of HIV in men is much higher in the incarcerated population than  
43  
44  
45 284 the general population because women with HIV risk factors like sex worker status, intimate  
46  
47 285 partner violence, drug and substance abuse are overrepresented in this population. (31)  
48  
49  
50 286 Additionally, women are exposed to sexual abuse while in custody and they have more access  
51  
52 287 barriers to HIV prevention, testing and treatment services compared to men. (32) Despite the  
53  
54 288 very high rates of HIV in this group, relative to the study done by Simooya et al in 1999 which  
55  
56  
57 289 showed a prevalence of 33% in females, the prevalence of HIV has reduced.(33) There has  
58  
59 290 been a 37.6% reduction in overall prevalence of HIV since the study in 2010-2011. (6) The  
60

1  
2  
3 291 reduction in prevalence of HIV in correctional facilities is attributable to the reduction of HIV  
4  
5  
6 292 prevalence in the general population(16), the implementation of test and treat across  
7  
8 293 Zambia(34), entry HIV testing and treatment(6) and use of correctional health committees to  
9  
10 294 strengthen TB/HIV service delivery at facility level(9). Among African countries with studies  
11  
12  
13 295 involving several correctional facilities, Zambia's prevalence is lower than South Africa's (25)  
14  
15 296 but higher than Burkina Faso and Uganda.

17  
18 297  
19  
20 298 The difference in prevalence of TB and HIV between residents and new entrants into  
21  
22  
23 299 correctional facilities was not statistically significant. This is possibly due to the following  
24  
25 300 reasons: a) individuals entering correctional facilities come from socio-economically  
26  
27 301 disadvantaged backgrounds where prevalence of TB and HIV are already high (1); b) there are  
28  
29  
30 302 high rates of recidivism (35); and c) detainees spend long periods in police cells, which have  
31  
32  
33 303 similar conditions to the correctional facilities (36, 37). However, the small sample size and  
34  
35 304 wide confidence intervals especially for the new entrants is a limiting factor for drawing any  
36  
37 305 inferences from this comparison. This finding highlights the contribution of imported TB and  
38  
39  
40 306 HIV cases to the burden of disease in correctional facilities and underscores the importance  
41  
42 307 of entry screening within this setting.

### 45 46 308 **Strengths and limitations**

47  
48 309 This study provides the most recent evidence on prevalence of TB and HIV in Zambian  
49  
50  
51 310 correctional facilities. The results of this study are generalizable to the 13 correctional  
52  
53 311 facilities, as a large sample representing 85% and 84% of the 13 correctional facility  
54  
55 312 population, was screened for TB and HIV respectively. By virtue of the data being  
56  
57  
58 313 disaggregated, it provides an opportunity for targeting of interventions that can reduce the  
59  
60

1  
2  
3 314 burden of both diseases. However, there were variations in the strength of screening  
4  
5 315 algorithms for TB, hence the prevalence of TB could have been underestimated in some  
6  
7  
8 316 correctional facilities. That said, among all forms TB cases, it is possible that some of the  
9  
10 317 clinically diagnosed TB cases might not be true TB cases as there are other differential causes  
11  
12  
13 318 of chest x-ray abnormalities that mimic TB. Inmates in court or on the farms were not  
14  
15 319 screened for TB which could have introduced bias during data collection. Additionally,  
16  
17  
18 320 asymptomatic TB was not consistently screened for.  
19  
20 321  
21  
22  
23

## 24 322 **CONCLUSION**

25  
26  
27  
28 323 Despite significant progress over the last decade in controlling TB and HIV in Zambian  
29  
30 324 correctional facilities, these continue to be disproportionately affected by both diseases.  
31  
32  
33 325 TB/HIV programs in correctional facilities need further strengthening to include aspects of  
34  
35 326 juvenile specific TB programming, gender responsive HIV programming and holistic integrated  
36  
37  
38 327 service delivery as TB and HIV are not exclusive health concerns of incarcerated individuals.  
39  
40 328 Additionally, there is need to consider use of more sensitive algorithms that include chest x-  
41  
42  
43 329 ray to minimize the risk of missing asymptomatic TB cases. Additional studies are required to  
44  
45 330 determine the true prevalence of asymptomatic TB in correctional facilities, to better  
46  
47  
48 331 understand the reason for high HIV burden among females in correctional facilities and to  
49  
50 332 determine the prevalence of TB and HIV using a sample whose results can be generalized to  
51  
52  
53 333 all the correctional facilities in Zambia.  
54  
55  
56  
57  
58  
59  
60



## 334 ETHICS STATEMENT

335 Approval to use the programmatic data was obtained from the University of Zambia  
336 Biomedical Research Ethics Committee No: 018-11-18 and the London School of Hygiene and  
337 Tropical Medicine Ethics Committee No: 21332. Since data was collected under programmatic  
338 conditions, no consent was sought for TB screening and verbal consent and assent were  
339 obtained for HIV testing. The EJOH project had obtained permission from the Zambia  
340 Correctional service and the Ministry of Community Development and Social services to  
341 conduct the screening activities including testing of juveniles. When migrating data from the  
342 paper-based registers to the electronic database, participant identifying information was  
343 excluded.

## 344 REFERENCES

- 345 1. World Health Organization. Tuberculosis in Prisons [cited 2020 20th July 2020]. Available  
346 from: <https://www.who.int/tb/areas-of-work/population-groups/prisons-facts/en/>.
- 347 2. Telisinghe L, Charalambous S, Topp SM, Herce ME, Hoffmann CJ, Barron P, et al. HIV and  
348 tuberculosis in prisons in sub-Saharan Africa. *The Lancet*. 2016;388(10050):1215-27.
- 349 3. Dolan K, Wirtz AL, Moazen B, Ndeffo-Mbah M, Galvani A, Kinner SA, et al. Global burden of  
350 HIV, viral hepatitis, and tuberculosis in prisoners and detainees. *The Lancet*. 2016;388(10049):1089-  
351 102.
- 352 4. Reid SE, Topp SM, Turnbull ER, Hatwiinda S, Harris JB, Maggard KR, et al. Tuberculosis and  
353 HIV control in sub-Saharan African prisons: "thinking outside the prison cell". *Journal of Infectious  
354 Diseases*. 2012;205(suppl\_2):S265-S73.
- 355 5. World Health Organization Regional Office for Europe. Prisons and health. Copenhagen,  
356 Denmark 2014. 45-70, 83 p.
- 357 6. Maggard KR, Hatwiinda S, Harris JB, Phiri W, Krüüner A, Kaunda K, et al. Screening for  
358 tuberculosis and testing for human immunodeficiency virus in Zambian prisons. *Bulletin of the World  
359 Health Organization*. 2015;93:93-101.
- 360 7. Ubumi Prisons Initiative. Zambian Prisons [updated 4th August 2020; cited 2020 4th August  
361 2020]. Available from: [https://ubumi.net/zambian\\_prisons.html](https://ubumi.net/zambian_prisons.html).
- 362 8. Herce ME, Hoffmann CJ, Fielding K, Topp SM, Hausler H, Chimoyi L, et al. Universal test-and-  
363 treat in Zambian and South African correctional facilities: a multisite prospective cohort study. *The  
364 Lancet HIV*. 2020;7(12):e807-e16.
- 365 9. Topp SM, Sharma A, Moonga CN, Chileshe C, Magwende G, Henostroza G. Evaluation of a  
366 health system strengthening initiative in the Zambian prison system. *BMJ global health*. 2018;3(1).

- 1  
2  
3 367 10. Herce ME, Muyoyeta M, Topp SM, Henostroza G, Reid SE. Coordinating the prevention,  
4 368 treatment, and care continuum for HIV-associated tuberculosis in prisons: a health systems  
5 369 strengthening approach. *Current Opinion in HIV and AIDS*. 2018;13(6):492.  
6 370  
7 371 11. Institute of Crime and Justice Policy Research B. World Prison Brief 2020 [cited 2020 21st  
8 372 July 2020]. Available from: <https://www.prisonstudies.org/country/zambia>.  
9 373  
10 374 12. Government of the Republic of Zambia. The Juvenile Act. Chapter 53 of the Laws of  
11 375 Zambia1964.  
12 376  
13 377 13. Government of the Republic of Zambia. The Prisons Act Lusaka, Zambia: Government  
14 378 Printer; 2004 [cited 2020 13th May 2020]. Available from:  
15 379 <https://www.parliament.gov.zm/node/840>.  
16 380  
17 381 14. Kapata N, Chanda-Kapata P, Ngosa W, Metitiri M, Klinkenberg E, Kalisvaart N, et al. The  
18 382 prevalence of tuberculosis in Zambia: results from the first national TB prevalence survey, 2013–  
19 383 2014. *PLoS One*. 2016;11(1):e0146392.  
20 384  
21 385 15. Kapata N, Mbulo G, Cobelens F, de Haas P, Schaap A, Mwamba P, et al. The second Zambian  
22 386 national tuberculosis drug resistance survey—a comparison of conventional and molecular methods.  
23 387 *Tropical Medicine & International Health*. 2015;20(11):1492-500.  
24 388  
25 389 16. Ministry of Health Zambia. Zambia Population-based HIV Impact assessment 2016. Lusaka;  
26 390 2019.  
27 391  
28 392 17. Donald PR, Marais BJ, Barry CE. Age and the epidemiology and pathogenesis of tuberculosis.  
29 393 *The Lancet*. 2010;375(9729):1852-4.  
30 394  
31 395 18. Stop TB partnership. Tuberculosis Situation in 2019, Zambia [cited 2021 19th February  
32 396 2021]. Available from: [http://stoptb.org/resources/cd/ZMB\\_Dashboard.html](http://stoptb.org/resources/cd/ZMB_Dashboard.html).  
33 397  
34 398 19. Todrys KW, Amon JJ. Human rights and health among juvenile prisoners in Zambia. *Int J*  
35 399 *Prison Health*. 2011;7(1):10-7.  
36 400  
37 401 20. Mabud TS, de Lourdes Delgado Alves M, Ko AI, Basu S, Walter KS, Cohen T, et al. Evaluating  
38 402 strategies for control of tuberculosis in prisons and prevention of spillover into communities: An  
39 403 observational and modeling study from Brazil. *PLoS medicine*. 2019;16(1):e1002737.  
40 404  
41 405 21. World Health Organisation. Chest Radiography in Tuberculosis Case Detection.  
42 406 Switzerland2016 [cited 2021 10th June 2021]. Available from:  
43 407 [https://apps.who.int/iris/bitstream/handle/10665/252424/9789241511506-](https://apps.who.int/iris/bitstream/handle/10665/252424/9789241511506-eng.pdf;jsessionid=72EC9D02021FEBF4C6CCA41896818F45?sequence=1)  
44 408 [eng.pdf;jsessionid=72EC9D02021FEBF4C6CCA41896818F45?sequence=1](https://apps.who.int/iris/bitstream/handle/10665/252424/9789241511506-eng.pdf;jsessionid=72EC9D02021FEBF4C6CCA41896818F45?sequence=1).  
45 409  
46 410 22. World Health Organisation. WHO operational handbook on TB diagnosis. Geneva2020 [cited  
47 411 2021 10th June 2021]. Available from: [https://www.who.int/publications/i/item/who-operational-](https://www.who.int/publications/i/item/who-operational-handbook-on-tuberculosis-module-3-diagnosis---rapid-diagnostics-for-tuberculosis-detection)  
48 412 [handbook-on-tuberculosis-module-3-diagnosis---rapid-diagnostics-for-tuberculosis-detection](https://www.who.int/publications/i/item/who-operational-handbook-on-tuberculosis-module-3-diagnosis---rapid-diagnostics-for-tuberculosis-detection).  
49 413  
50 414 23. Melese A, Demelash H. The prevalence of tuberculosis among prisoners in Ethiopia: a  
51 415 systematic review and meta-analysis of published studies. *Archives of Public Health*. 2017;75(1):1-9.  
52 416  
53 417 24. Banda H, Gausi F, Harries A, Salaniponi F. Prevalence of smear-positive pulmonary  
54 418 tuberculosis among prisoners in Malawi: a national survey. *The international journal of tuberculosis*  
55 419 *and lung disease*. 2009;13(12):1557-9.  
56 420  
57 421 25. Stevenson KA, Podewils LJ, Zishiri VK, Castro KG, Charalambous S. HIV prevalence and the  
58 422 cascade of care in five South African correctional facilities. *PLoS One*. 2020;15(7):e0235178.  
59 423  
60 424 26. Organization WH. WHO policy on TB infection control in health-care facilities, congregate  
425 426 settings and households. World Health Organization; 2009. Report No.: 9241598328.  
427 428  
429 429 27. World health Organisation. Global Tuberculosis Report 2019 2019 [Available from:  
430 430 <https://apps.who.int/iris/bitstream/handle/10665/329368/9789241565714-eng.pdf?ua=1>.  
431 431  
432 432 28. Gizachew Beza M, Hunegnaw E, Tiruneh M. Prevalence and associated factors of  
433 433 tuberculosis in prisons settings of East Gojjam Zone, Northwest Ethiopia. *International journal of*  
434 434 *bacteriology*. 2017;2017.  
435 435  
436 436 29. Séri B, Koffi A, Danel C, Ouassa T, Blehoué M-A, Ouattara E, et al. Prevalence of pulmonary  
437 437 tuberculosis among prison inmates: A cross-sectional survey at the Correctional and Detention  
438 438 Facility of Abidjan, Côte d'Ivoire. *PLoS one*. 2017;12(7):e0181995.

- 1  
2  
3 418 30. Noeske J, Ndi N, Mbondi S. Controlling tuberculosis in prisons against confinement  
4 419 conditions: a lost case? Experience from Cameroon. *The International journal of tuberculosis and*  
5 420 *lung disease.* 2011;15(2):223-7.  
6 421 31. United Nations Office on Drug and Crime U. Women and HIV in prison settings Austria2008  
7 422 [cited 2021 1st February 2021]. Available from:  
8 423 [https://www.unodc.org/documents/middleeastandnorthafrica/drug-prevention-health-](https://www.unodc.org/documents/middleeastandnorthafrica/drug-prevention-health-publications/WOMEN_AND_HIV_IN_PRISON_SETTINGS.pdf)  
9 424 [publications/WOMEN\\_AND\\_HIV\\_IN\\_PRISON\\_SETTINGS.pdf](https://www.unodc.org/documents/middleeastandnorthafrica/drug-prevention-health-publications/WOMEN_AND_HIV_IN_PRISON_SETTINGS.pdf).  
10 425 32. Todrys KW, Amon JJ. Health and human rights of women imprisoned in Zambia. *BMC*  
11 426 *international health and human rights.* 2011;11(1):1-7.  
12 427 33. Simooya OO, Sanjobo NE, Kaetano L, Sijumbila G, Munkonze FH, Tailoka F, et al. 'Behind  
13 428 walls': a study of HIV risk behaviours and seroprevalence in prisons in Zambia. *Aids.*  
14 429 2001;15(13):1741-4.  
15 430 34. Zambia MoH. Zambia Consolidated Guidelines on Treatment and Prevention of HIV  
16 431 infection. Lusaka; 2016.  
17 432 35. Yukhnenko D, Sridhar S, Fazel S. A systematic review of criminal recidivism rates worldwide:  
18 433 3-year update. *Wellcome open research.* 2019;4.  
19 434 36. Henostroza G, Topp SM, Hatwiinda S, Maggard KR, Phiri W, Harris JB, et al. The high burden  
20 435 of tuberculosis (TB) and human immunodeficiency virus (HIV) in a large Zambian prison: a public  
21 436 health alert. *PloS one.* 2013;8(8):e67338.  
22 437 37. Todrys KW, Amon JJ, Malembeka G, Clayton M. Imprisoned and imperiled: access to HIV and  
23 438 TB prevention and treatment, and denial of human rights, in Zambian prisons. *Journal of the*  
24 439 *International AIDS Society.* 2011;14(1):1-11.

28 440  
29  
30

## 31 441 **ACKNOWLEDGEMENT**

32  
33  
34  
35 442 The Zambia Correctional Service, Ministry of Community Development and Social Welfare and  
36  
37  
38 443 the correctional health committees are acknowledged for the support provided to the EJJOH  
39  
40 444 project team during data collection. Innocent Mwaba is acknowledged for drawing the map  
41  
42  
43 445 showing study sites.  
44  
45 446

## 46 47 48 49 447 **FUNDING**

50  
51  
52  
53 448 This research was funded by the Elton John AIDS Foundation; under the Elton John Juveniles  
54  
55 449 Offenders' Health (EJJOH) project (no grant number received).  
56  
57  
58 450  
59  
60

## 451 AUTHOR CONTRIBUTIONS

452 Conceived and designed the study: MK, SH, CNM, MM. Database design and data curation:  
453 PS, JB. Implemented the study: MK, SH, MT, TZ, CNM, MM. Data analysis: PS, MK, FB. Wrote  
454 the original draft: MK. Reviewed the manuscript: SH, MT, JB, PS, TZ, FB, CNM, MM. Approved  
455 the final version to be published: MK, SH, PS, MT, JB, TZ, FB, CNM, MM.

456 The corresponding author attests that all listed authors meet authorship criteria and that no  
457 others meeting the criteria have been omitted.

## 459 CONFLICT OF INTEREST

460 The authors declare no conflict of interest.

## 462 DATA SHARING STATEMENT

463 Additional data is available upon request by emailing [Monde.Muyoyeta@cidrz.org](mailto:Monde.Muyoyeta@cidrz.org)

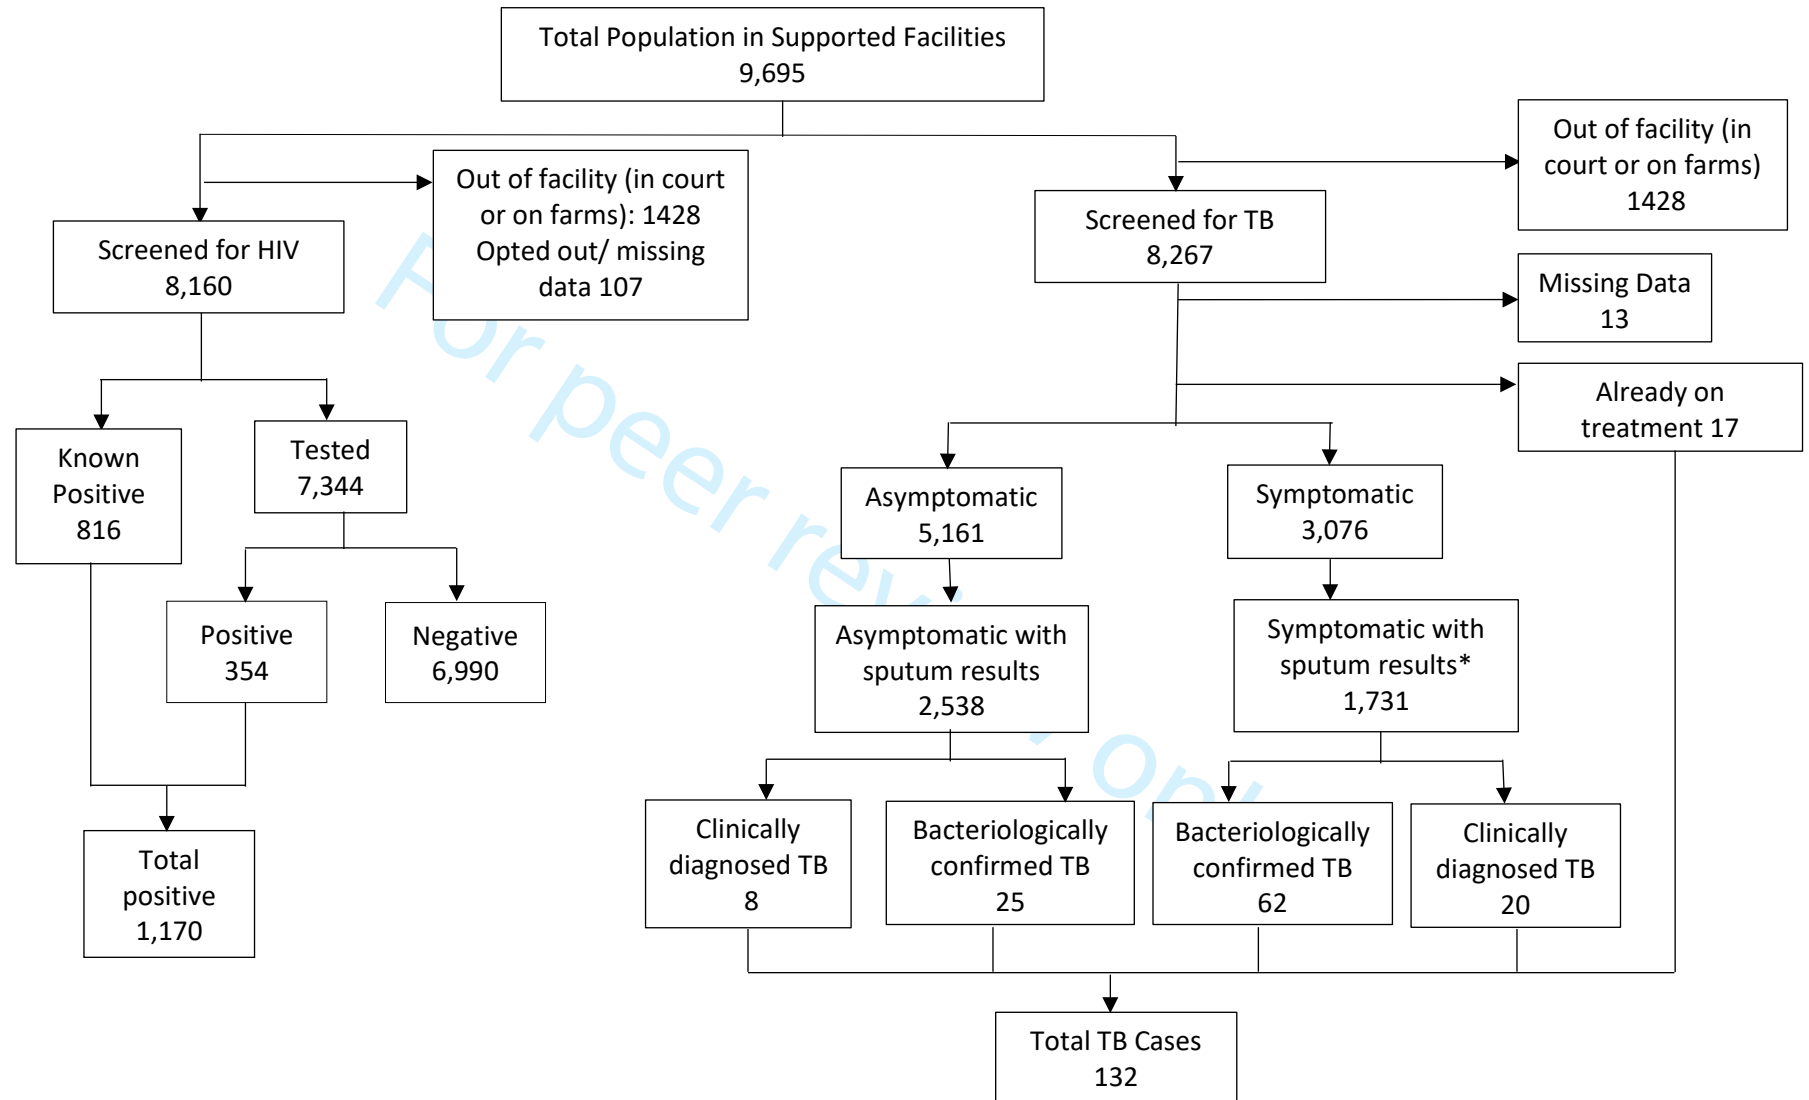

HIV- Human Immunodeficiency Virus, TB- Tuberculosis

\*All symptomatic patients submitted sputum, however, some correctional facilities only documented results of patients with positive results.

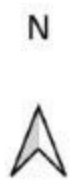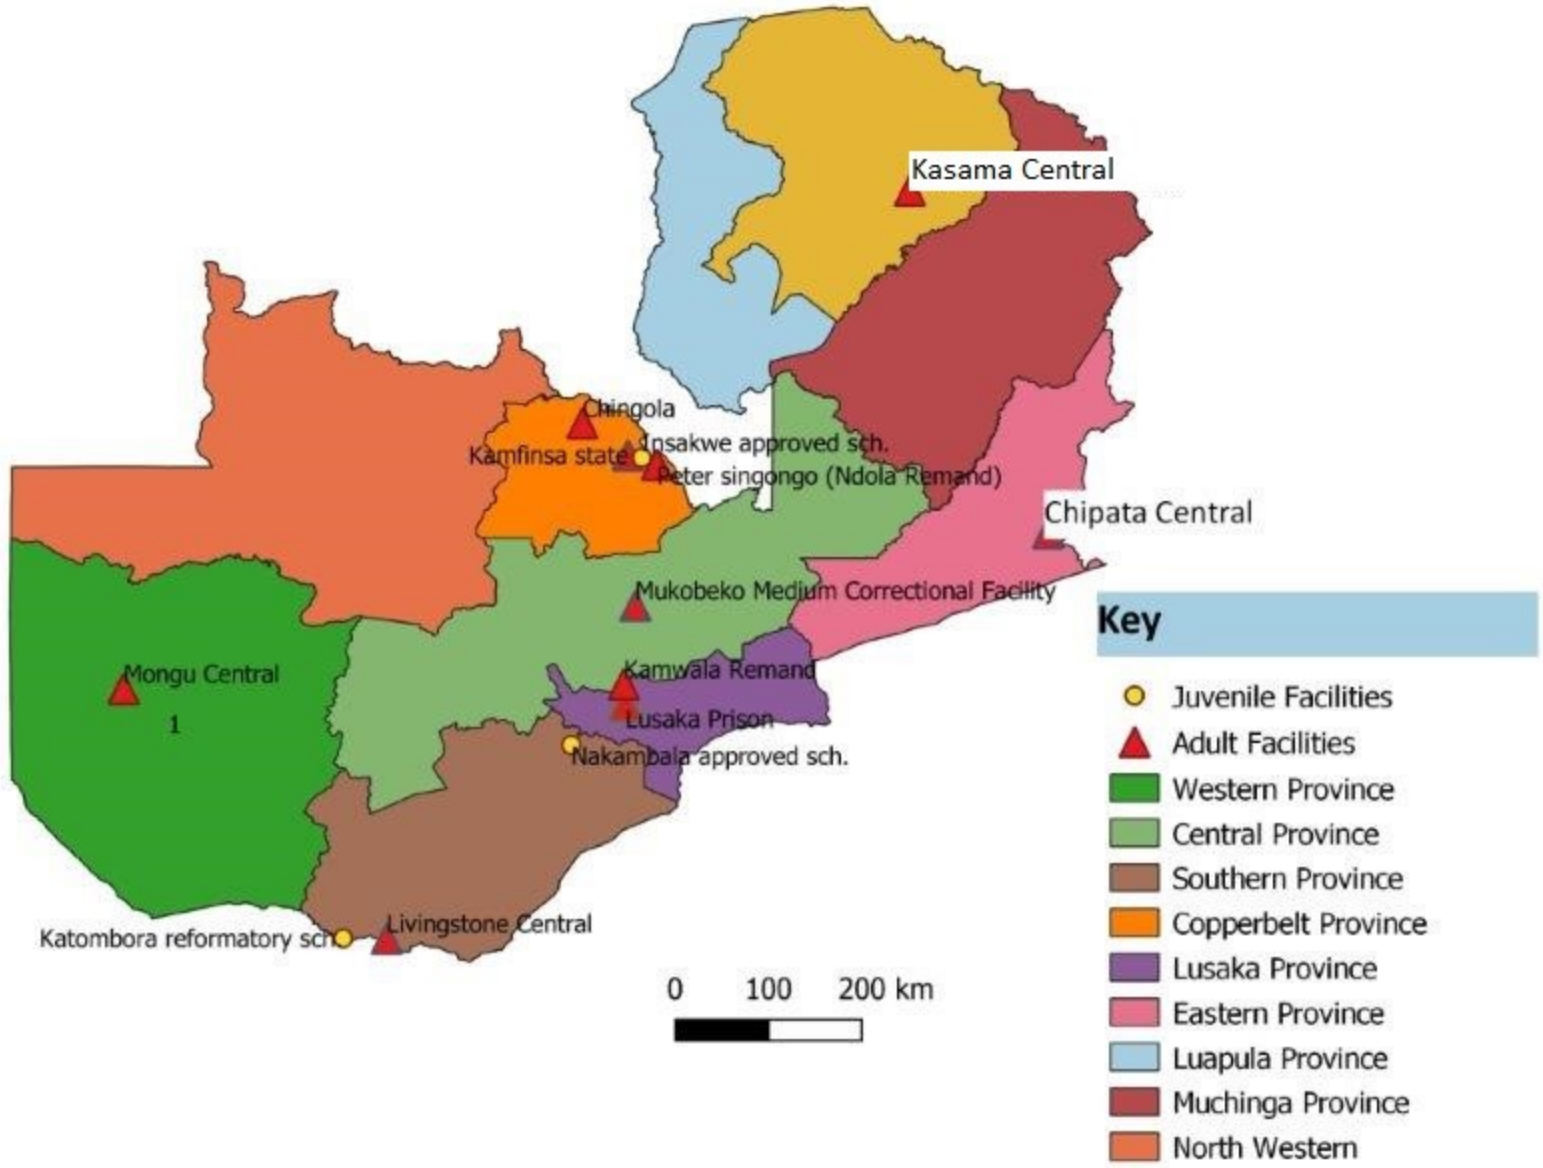

1  
2  
3  
4  
5  
6  
7  
8  
9  
10  
11  
12  
13  
14  
15  
16  
17  
18  
19  
20  
21  
22  
23  
24  
25  
26  
27  
28  
29  
30  
31  
32  
33  
34  
35  
36  
37  
38  
39  
40  
41  
42  
43  
44  
45  
46  
47

STROBE Statement—Checklist of items that should be included in reports of *cross-sectional studies*

|                              | Item No | Recommendation                                                                                                                                                                                    | Page No |
|------------------------------|---------|---------------------------------------------------------------------------------------------------------------------------------------------------------------------------------------------------|---------|
| <b>Title and abstract</b>    | 1       | (a) Indicate the study's design with a commonly used term in the title or the abstract                                                                                                            | 1       |
|                              |         | (b) Provide in the abstract an informative and balanced summary of what was done and what was found                                                                                               | 2,3     |
| <b>Introduction</b>          |         |                                                                                                                                                                                                   |         |
| Background/rationale         | 2       | Explain the scientific background and rationale for the investigation being reported                                                                                                              | 5,6     |
| Objectives                   | 3       | State specific objectives, including any prespecified hypotheses                                                                                                                                  | 6       |
| <b>Methods</b>               |         |                                                                                                                                                                                                   |         |
| Study design                 | 4       | Present key elements of study design early in the paper                                                                                                                                           | 5       |
| Setting                      | 5       | Describe the setting, locations, and relevant dates, including periods of recruitment, exposure, follow-up, and data collection                                                                   | 6,7     |
| Participants                 | 6       | (a) Give the eligibility criteria, and the sources and methods of selection of participants                                                                                                       | 7,8     |
| Variables                    | 7       | Clearly define all outcomes, exposures, predictors, potential confounders, and effect modifiers. Give diagnostic criteria, if applicable                                                          | 8,9     |
| Data sources/<br>measurement | 8*      | For each variable of interest, give sources of data and details of methods of assessment (measurement). Describe comparability of assessment methods if there is more than one group              | 7,8     |
| Bias                         | 9       | Describe any efforts to address potential sources of bias                                                                                                                                         | 7       |
| Study size                   | 10      | Explain how the study size was arrived at                                                                                                                                                         | 7       |
| Quantitative variables       | 11      | Explain how quantitative variables were handled in the analyses. If applicable, describe which groupings were chosen and why                                                                      | 8,9     |
| Statistical methods          | 12      | (a) Describe all statistical methods, including those used to control for confounding                                                                                                             | 8,9     |
|                              |         | (b) Describe any methods used to examine subgroups and interactions                                                                                                                               | 8,9     |
|                              |         | (c) Explain how missing data were addressed                                                                                                                                                       | 9       |
|                              |         | (d) If applicable, describe analytical methods taking account of sampling strategy                                                                                                                |         |
|                              |         | (e) Describe any sensitivity analyses                                                                                                                                                             |         |
| <b>Results</b>               |         |                                                                                                                                                                                                   |         |
| Participants                 | 13*     | (a) Report numbers of individuals at each stage of study—eg numbers potentially eligible, examined for eligibility, confirmed eligible, included in the study, completing follow-up, and analysed | 9, 10   |
|                              |         | (b) Give reasons for non-participation at each stage                                                                                                                                              | 9,10    |
|                              |         | (c) Consider use of a flow diagram                                                                                                                                                                | 10      |
| Descriptive data             | 14*     | (a) Give characteristics of study participants (eg demographic, clinical, social) and information on exposures and potential confounders                                                          | 10,11   |
|                              |         | (b) Indicate number of participants with missing data for each variable of interest                                                                                                               | 11-14   |
| Outcome data                 | 15*     | Report numbers of outcome events or summary measures                                                                                                                                              | 11-14   |

1  
2  
3  
4  
5  
6  
7  
8  
9  
10  
11  
12  
13  
14  
15  
16  
17  
18  
19  
20  
21  
22  
23  
24  
25  
26  
27  
28  
29  
30  
31  
32  
33  
34  
35  
36  
37  
38  
39  
40  
41  
42  
43  
44  
45  
46  
47  
48  
49  
50  
51  
52  
53  
54  
55  
56  
57  
58  
59  
60

|                          |    |                                                                                                                                                                                                              |       |
|--------------------------|----|--------------------------------------------------------------------------------------------------------------------------------------------------------------------------------------------------------------|-------|
| Main results             | 16 | (a) Give unadjusted estimates and, if applicable, confounder-adjusted estimates and their precision (eg, 95% confidence interval). Make clear which confounders were adjusted for and why they were included |       |
|                          |    | (b) Report category boundaries when continuous variables were categorized                                                                                                                                    | 11-14 |
|                          |    | (c) If relevant, consider translating estimates of relative risk into absolute risk for a meaningful time period                                                                                             |       |
| Other analyses           | 17 | Report other analyses done—eg analyses of subgroups and interactions, and sensitivity analyses                                                                                                               | 11-14 |
| <b>Discussion</b>        |    |                                                                                                                                                                                                              |       |
| Key results              | 18 | Summarise key results with reference to study objectives                                                                                                                                                     | 14    |
| Limitations              | 19 | Discuss limitations of the study, taking into account sources of potential bias or imprecision. Discuss both direction and magnitude of any potential bias                                                   | 17-18 |
| Interpretation           | 20 | Give a cautious overall interpretation of results considering objectives, limitations, multiplicity of analyses, results from similar studies, and other relevant evidence                                   | 14-17 |
| Generalisability         | 21 | Discuss the generalisability (external validity) of the study results                                                                                                                                        | 17    |
| <b>Other information</b> |    |                                                                                                                                                                                                              |       |
| Funding                  | 22 | Give the source of funding and the role of the funders for the present study and, if applicable, for the original study on which the present article is based                                                | 21    |

\*Give information separately for exposed and unexposed groups.

**Note:** An Explanation and Elaboration article discusses each checklist item and gives methodological background and published examples of transparent reporting. The STROBE checklist is best used in conjunction with this article (freely available on the Web sites of PLoS Medicine at <http://www.plosmedicine.org/>, Annals of Internal Medicine at <http://www.annals.org/>, and Epidemiology at <http://www.epidem.com/>). Information on the STROBE Initiative is available at [www.strobe-statement.org](http://www.strobe-statement.org).
