# Supplementary figures and images for: Cross-sectional assessment of tuberculosis and HIV prevalence in 13 correctional facilities in Zambia
Source: PubMed Central journal article supplement — BMJ Open. 2021 Sep 27;11(9):e052221. doi: 10.1136/bmjopen-2021-052221 (PMC8477336; doi:10.1136/bmjopen-2021-052221), 2021-09-27

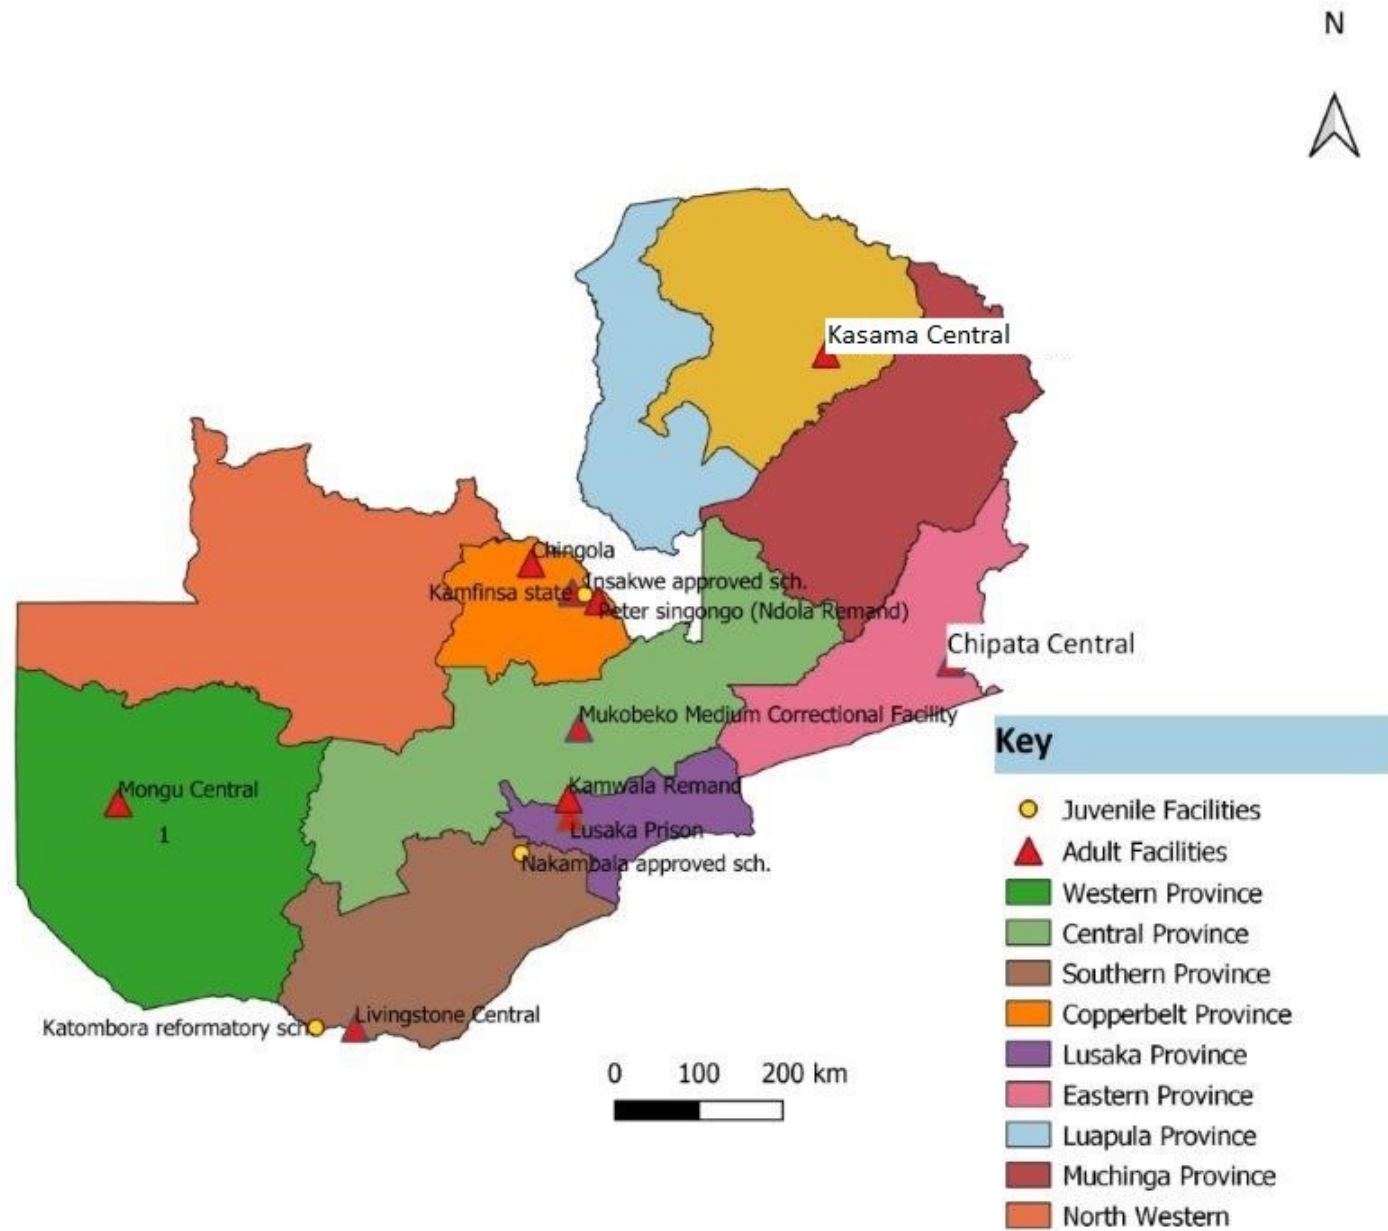

Supplement: bmjopen-2021-052221supp001.pdf [file bmjopen-2021-052221supp001.pdf]
